# Supplementary material for: Synthesis of a C1–C11 fragment of Zincophorin using planar chiral, neutral π-allyl iron complexes
Source: Royal Society of Chemistry journal article supplement (doi:10.1039/c3ob40894a), 2013-01-01

## SUPPLEMENTARY INFORMATION 2

### Synthesis of a C1–C11 Fragment of Zincophorin Using Planar Chiral, Neutral $\pi$ -Allyl Iron Complexes

John P Cooksey\*

*<sup>a</sup>School of Chemistry, University of Leeds, Leeds, LS2 9JT  
e-mail J.P.Cooksey@leeds.ac.uk.*

#### CONTENTS

<sup>1</sup>H NMR and <sup>13</sup>C NMR Spectra

|                                               |    |
|-----------------------------------------------|----|
| Compound <b>13</b>                            | 2  |
| Compound <b>14</b>                            | 3  |
| Compound <b>15</b>                            | 4  |
| Compound <b>17</b>                            | 5  |
| Compound <b>18</b>                            | 6  |
| Compound <b>19</b>                            | 7  |
| Compound <b>20</b>                            | 8  |
| Compound <b>21</b>                            | 9  |
| Compound <b>22</b>                            | 10 |
| Compound <b>23</b>                            | 11 |
| Compound <b>10</b>                            | 12 |
| Compound <b>24</b>                            | 13 |
| Compound (2 <i>R</i> ,4 <i>S</i> )- <b>11</b> | 14 |
| Compound <b>8</b>                             | 15 |
| Compound <b>9</b>                             | 16 |
| Compound <b>S5</b>                            | 17 |
| Compound <b>S6</b>                            | 18 |
| Compound <b>S7</b>                            | 19 |
| Compound <b>S8</b>                            | 20 |
| Compound <i>ent</i> - <b>1</b>                | 21 |

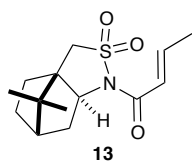

$^1\text{H}$  NMR (500 MHz,  $\text{CDCl}_3$ )

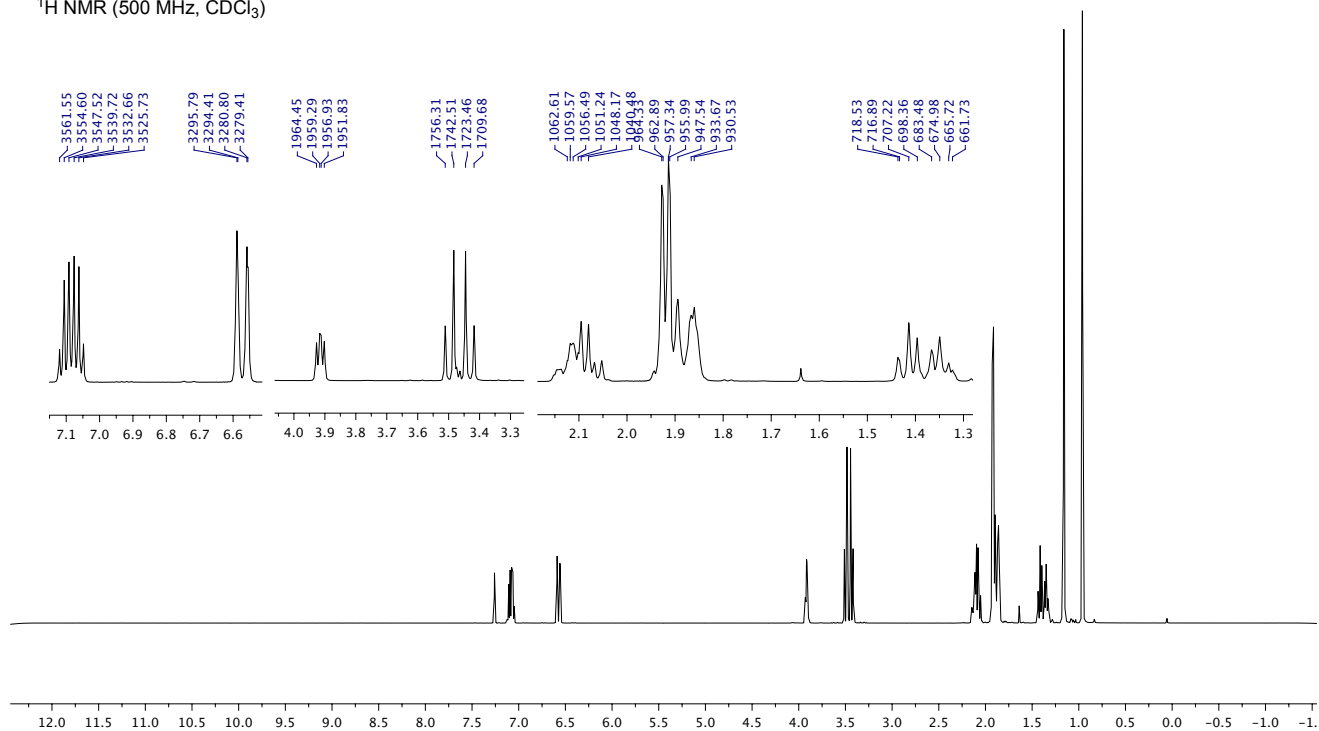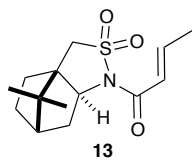

$^{13}\text{C}$  NMR (75 MHz,  $\text{CDCl}_3$ )

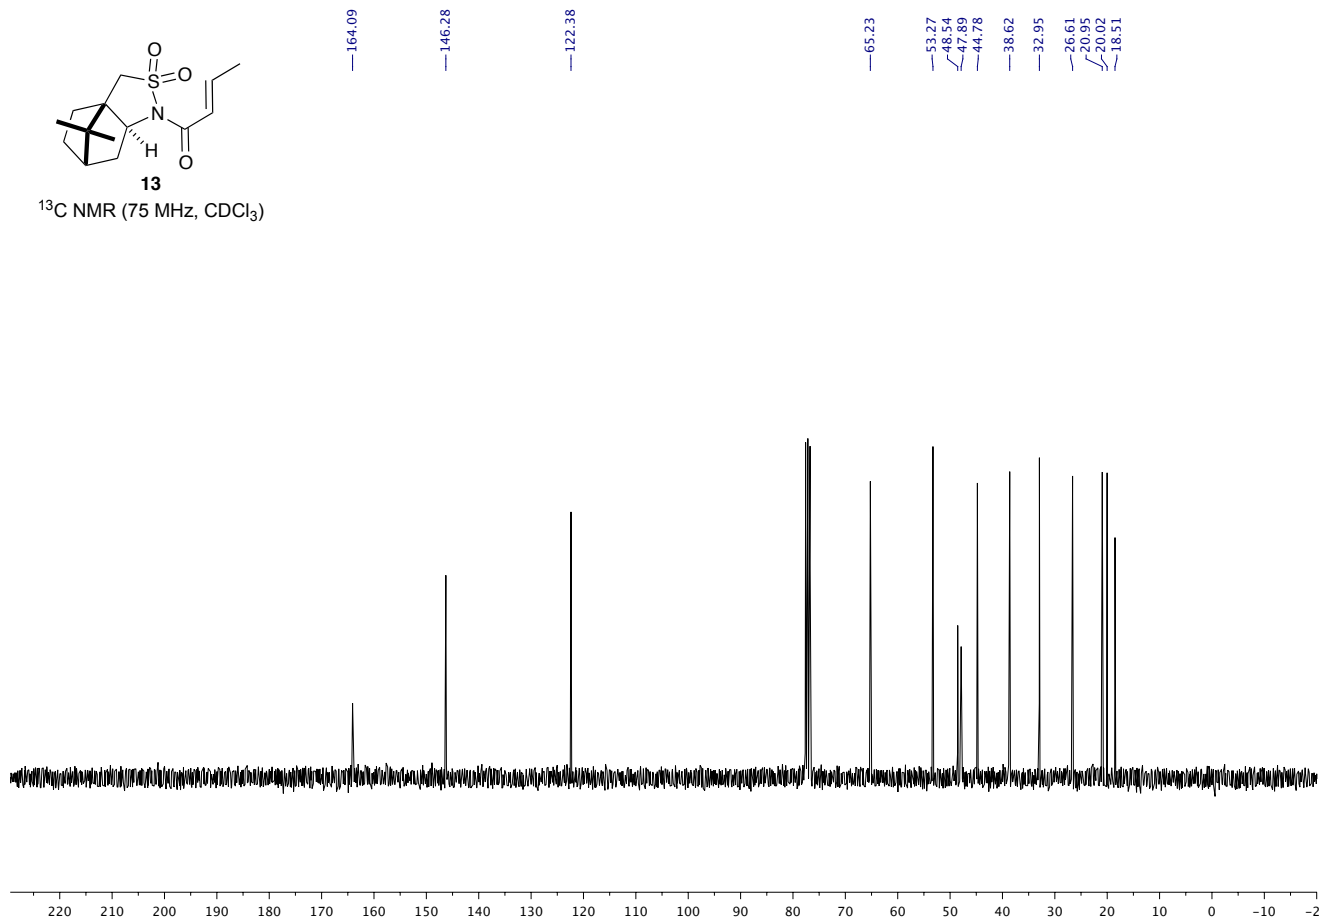

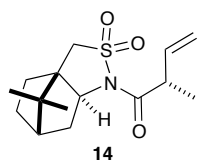

$^1\text{H}$  NMR (500 MHz,  $\text{CDCl}_3$ )

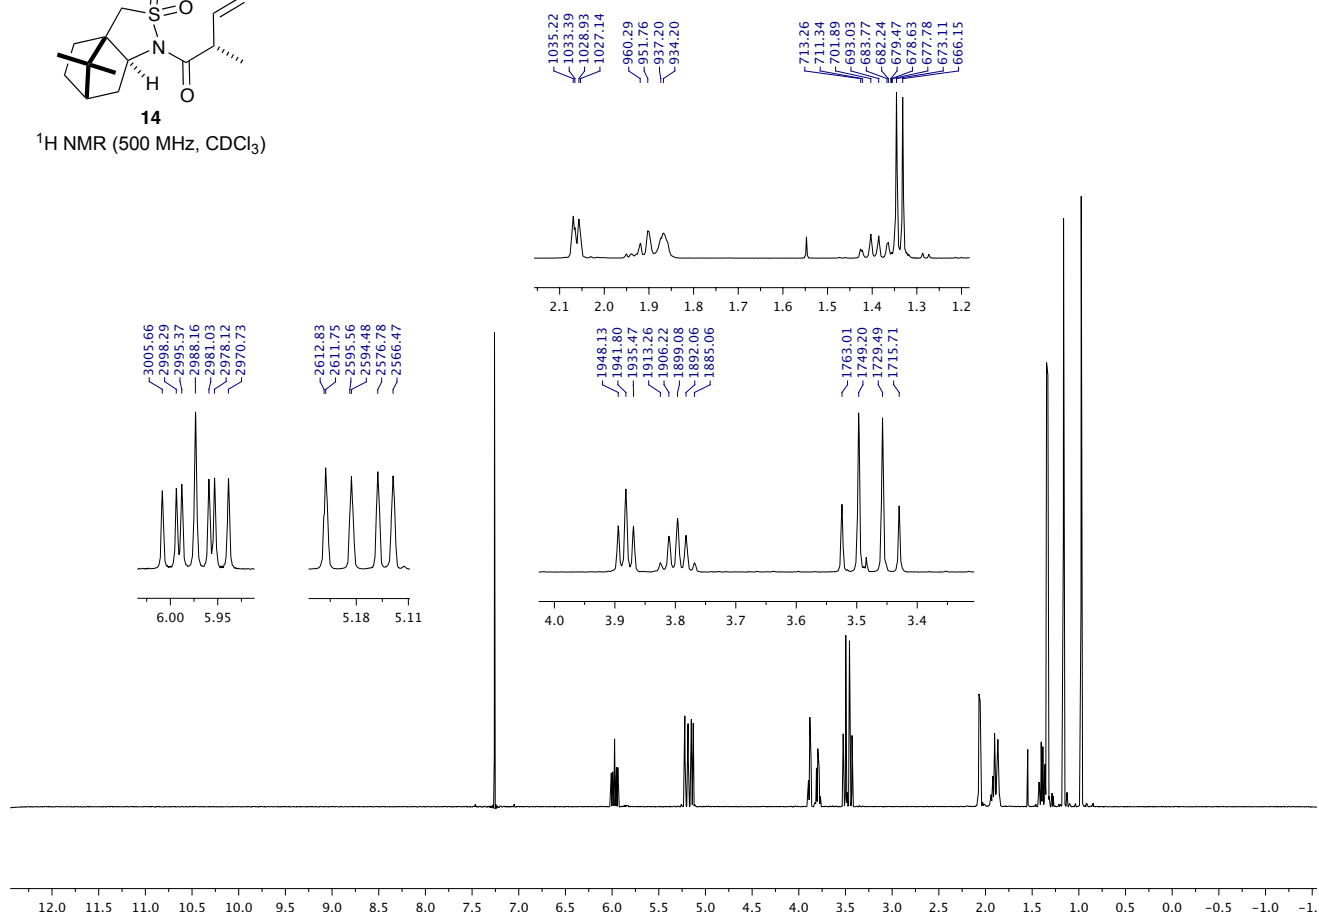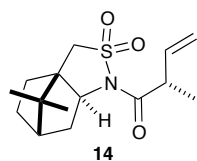

$^{13}\text{C}$  NMR (75 MHz,  $\text{CDCl}_3$ )

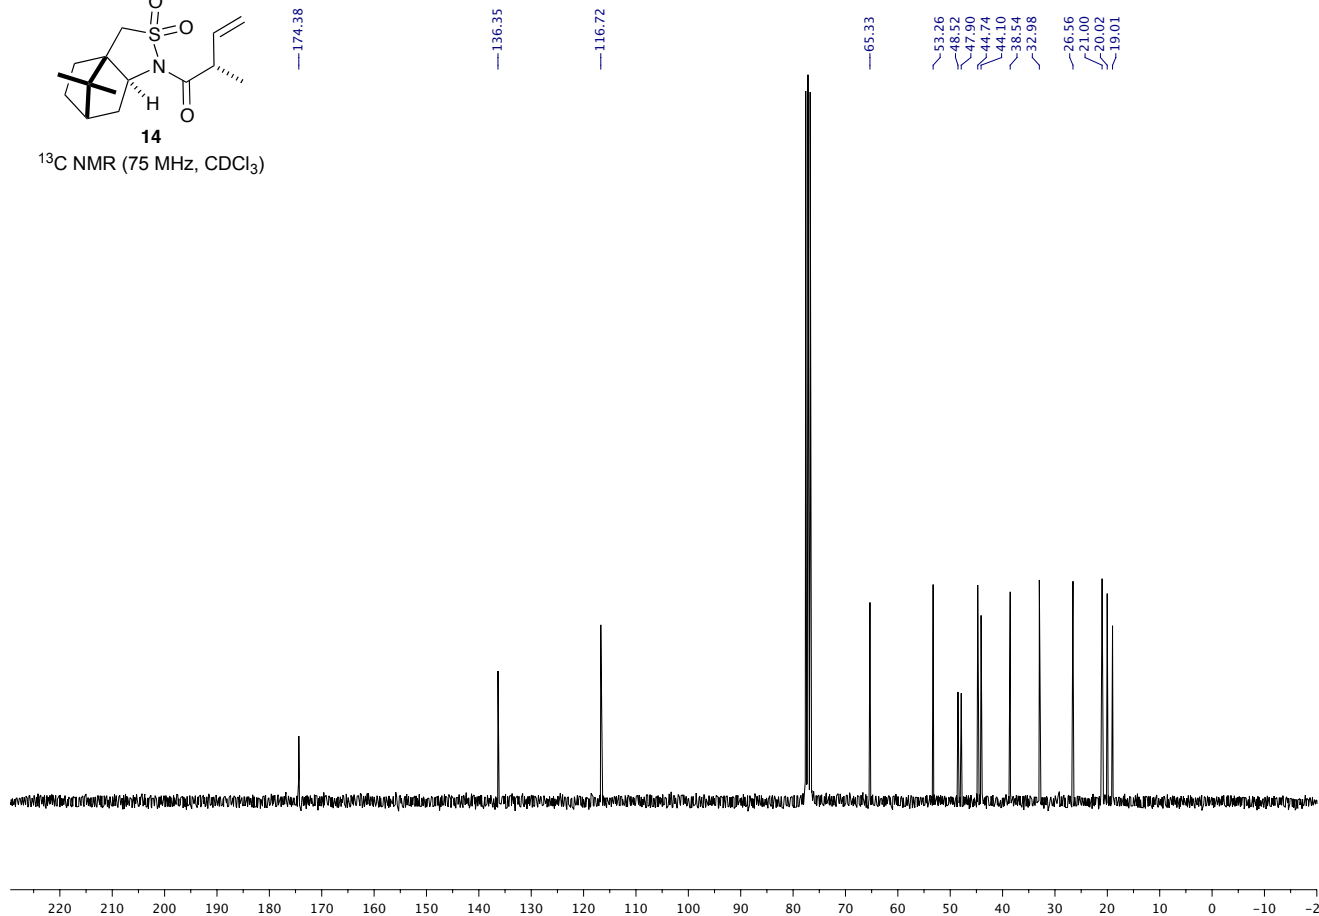

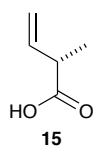

$^1\text{H}$  NMR (500 MHz,  $\text{CDCl}_3$ )

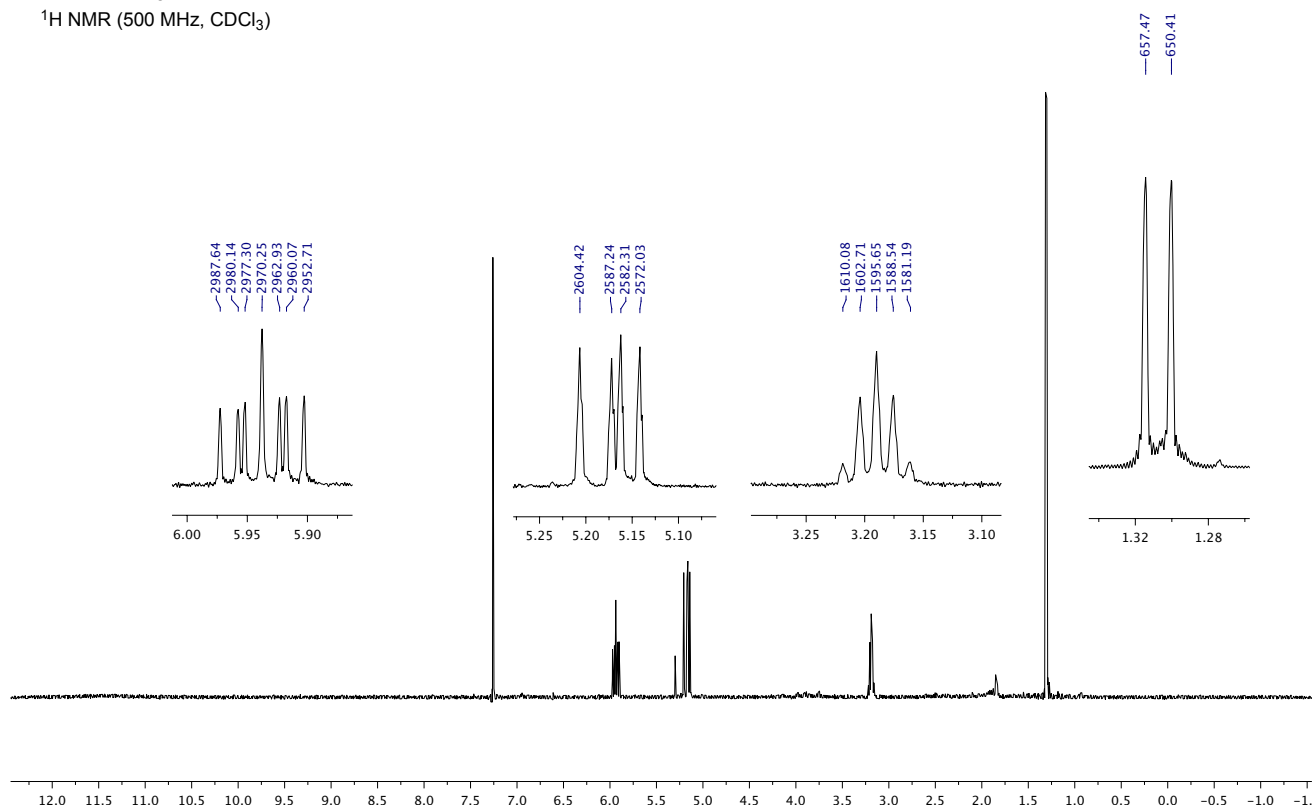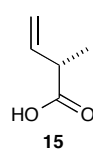

$^{13}\text{C}$  NMR (75 MHz,  $\text{CDCl}_3$ )

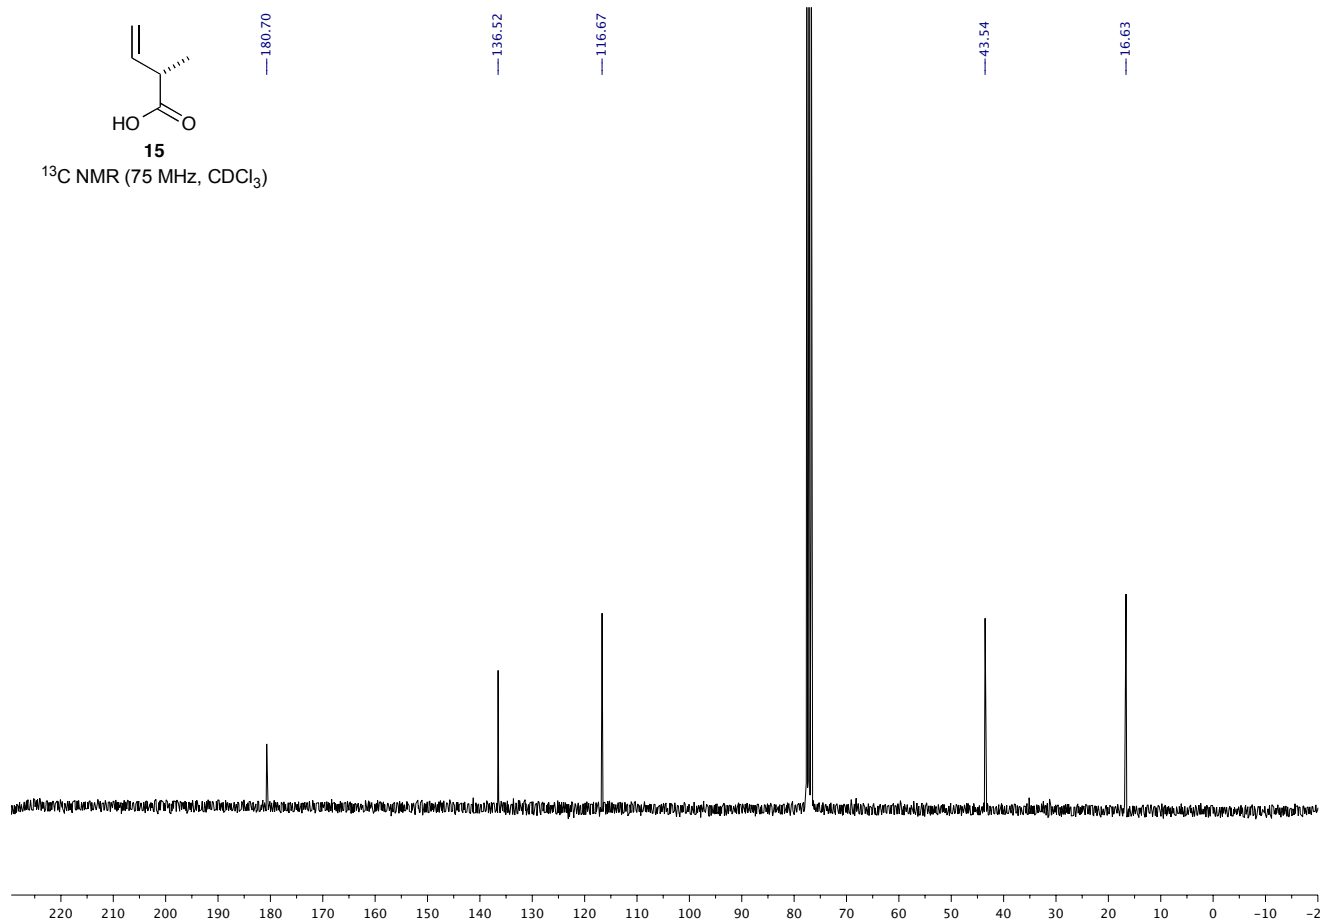

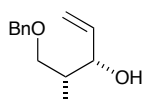

**17**

$^1\text{H}$  NMR (500 MHz,  $\text{CDCl}_3$ )

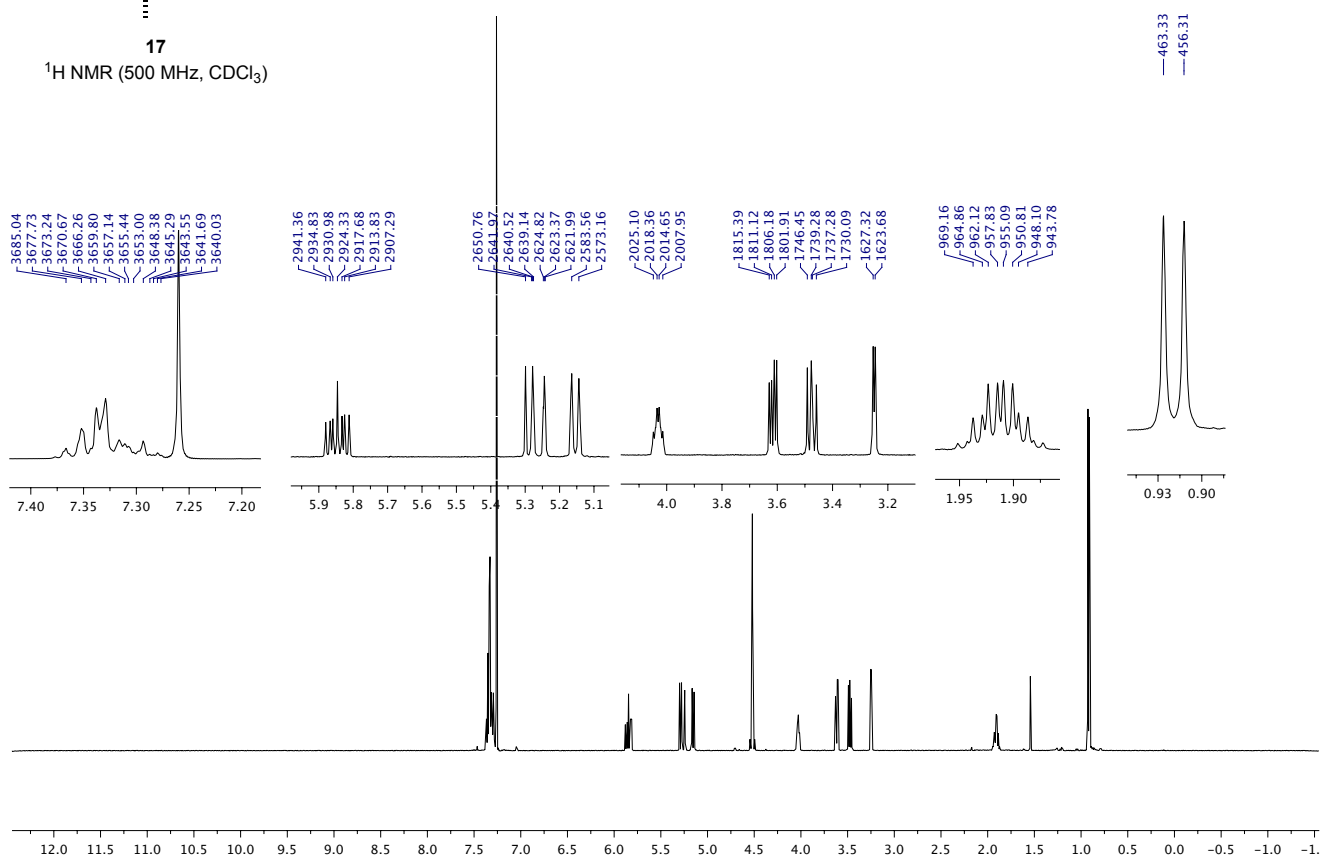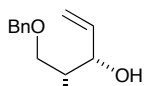

**17**

$^{13}\text{C}$  NMR (75 MHz,  $\text{CDCl}_3$ )

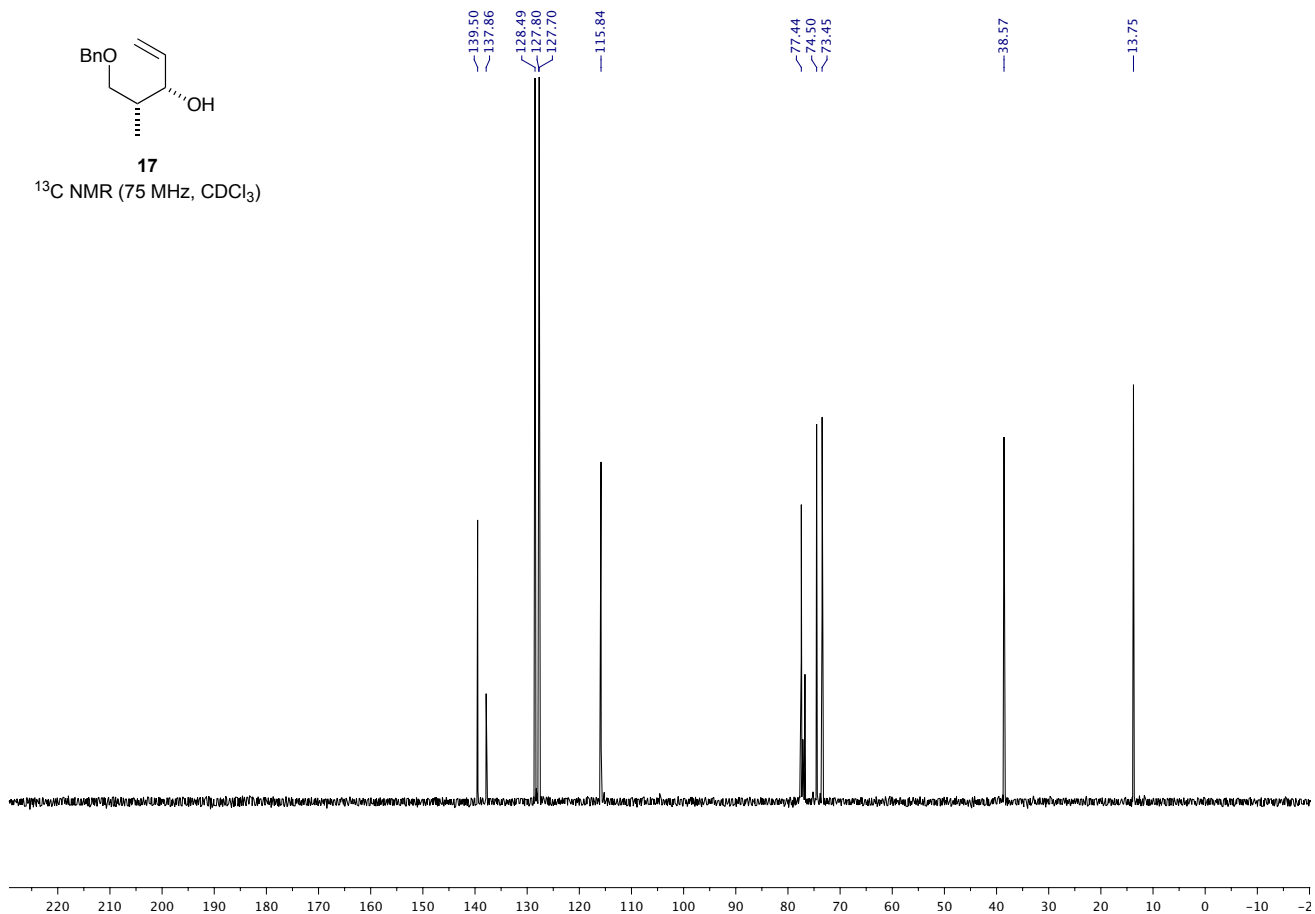

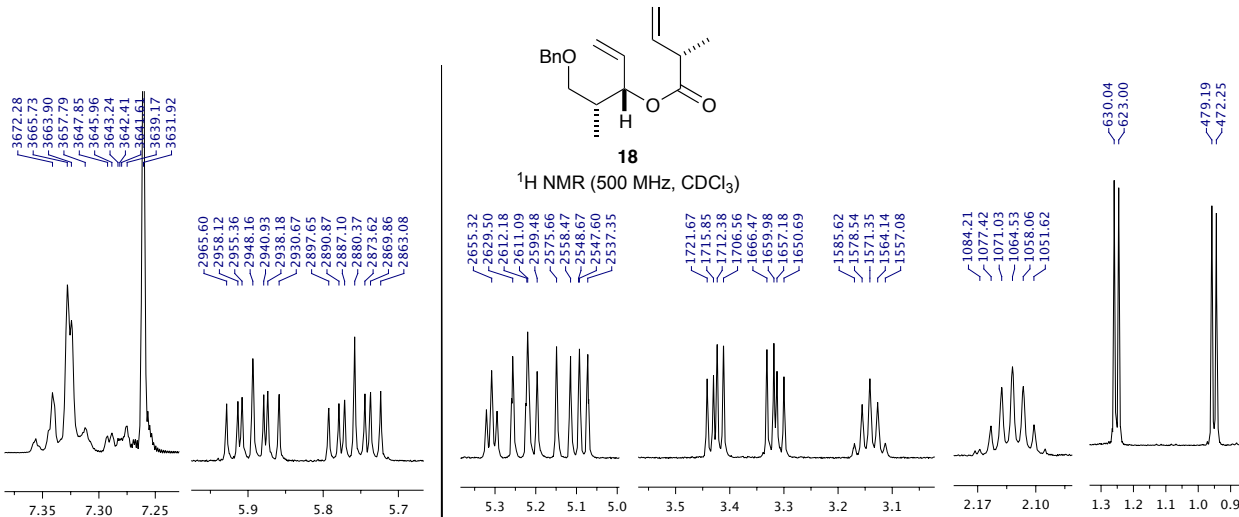

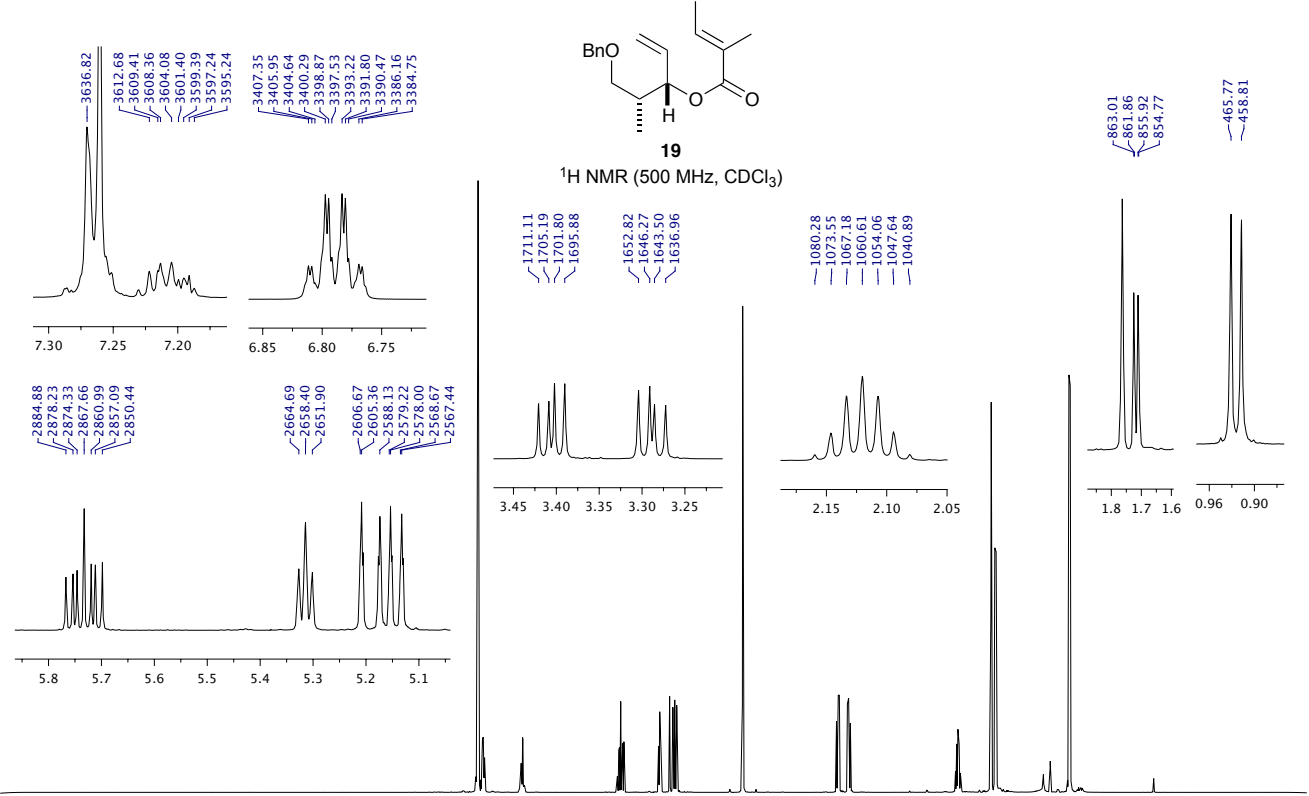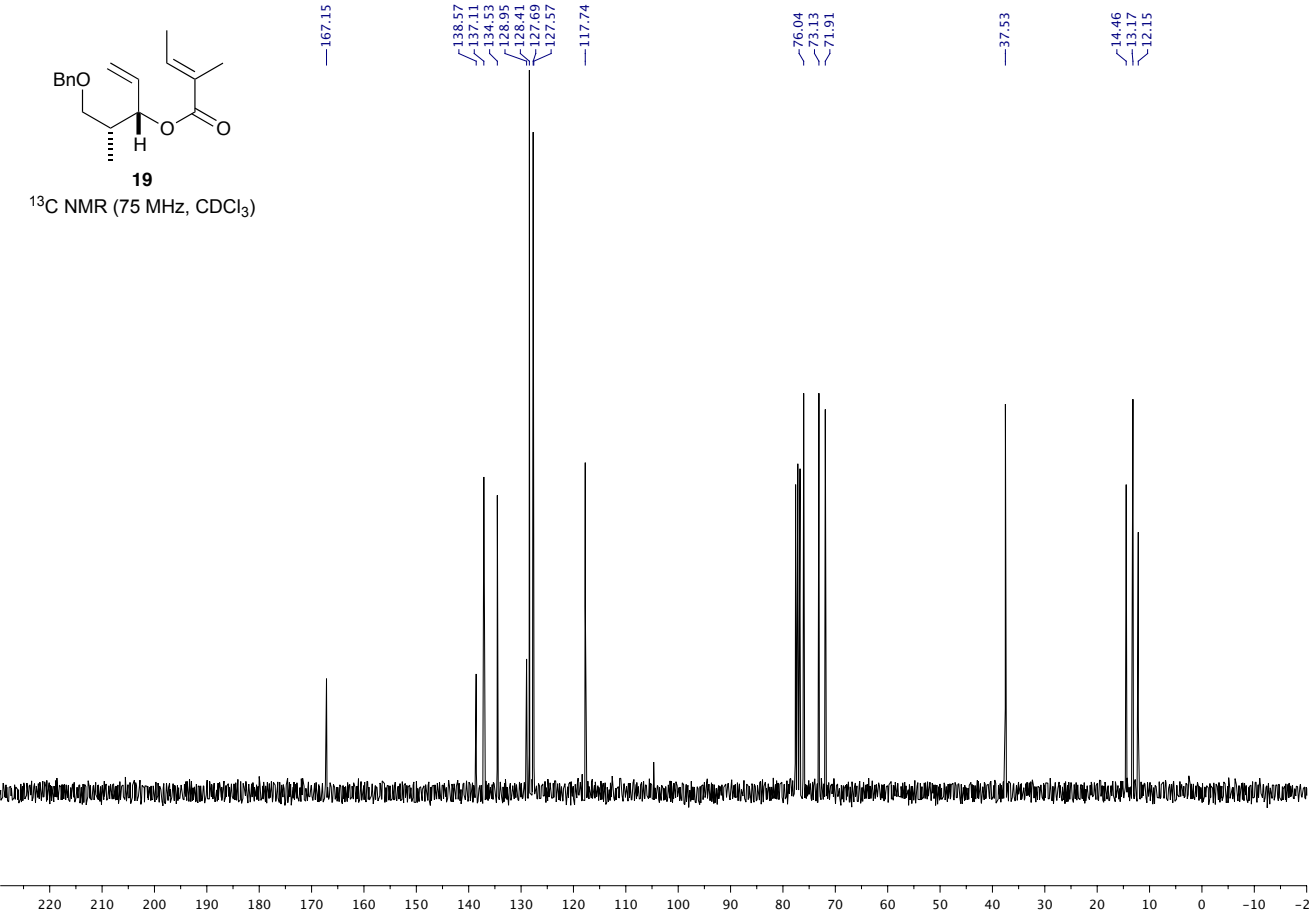

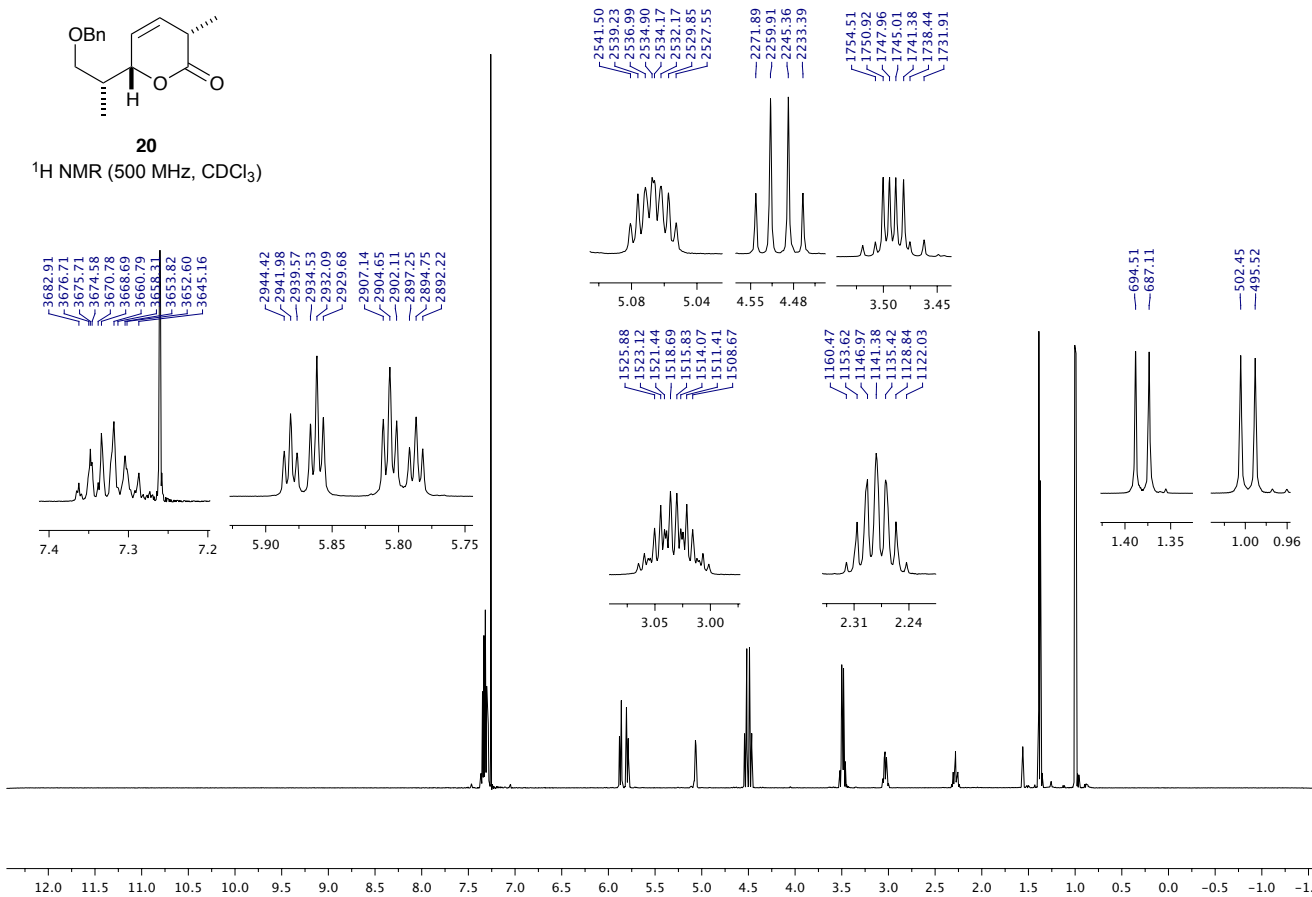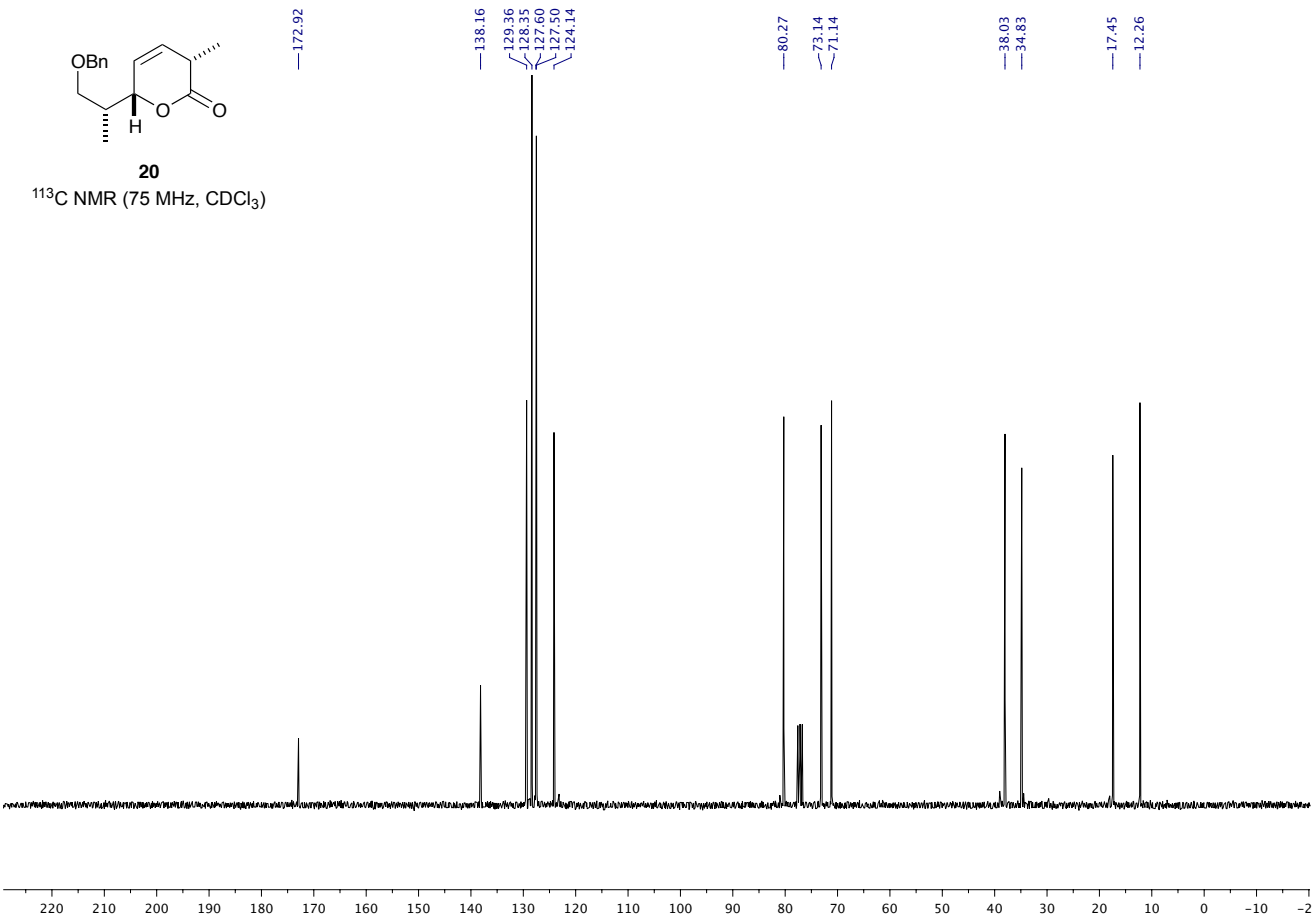



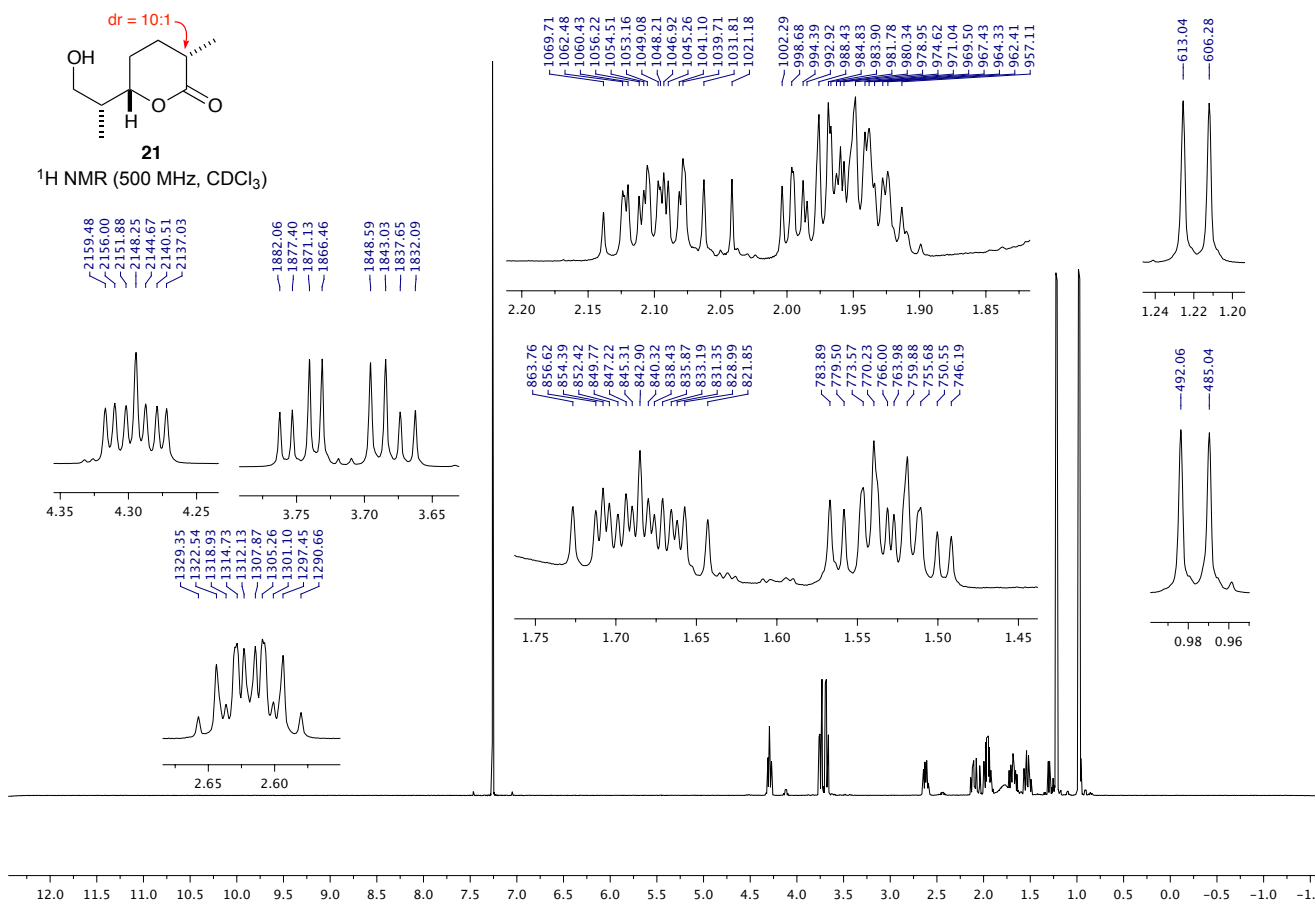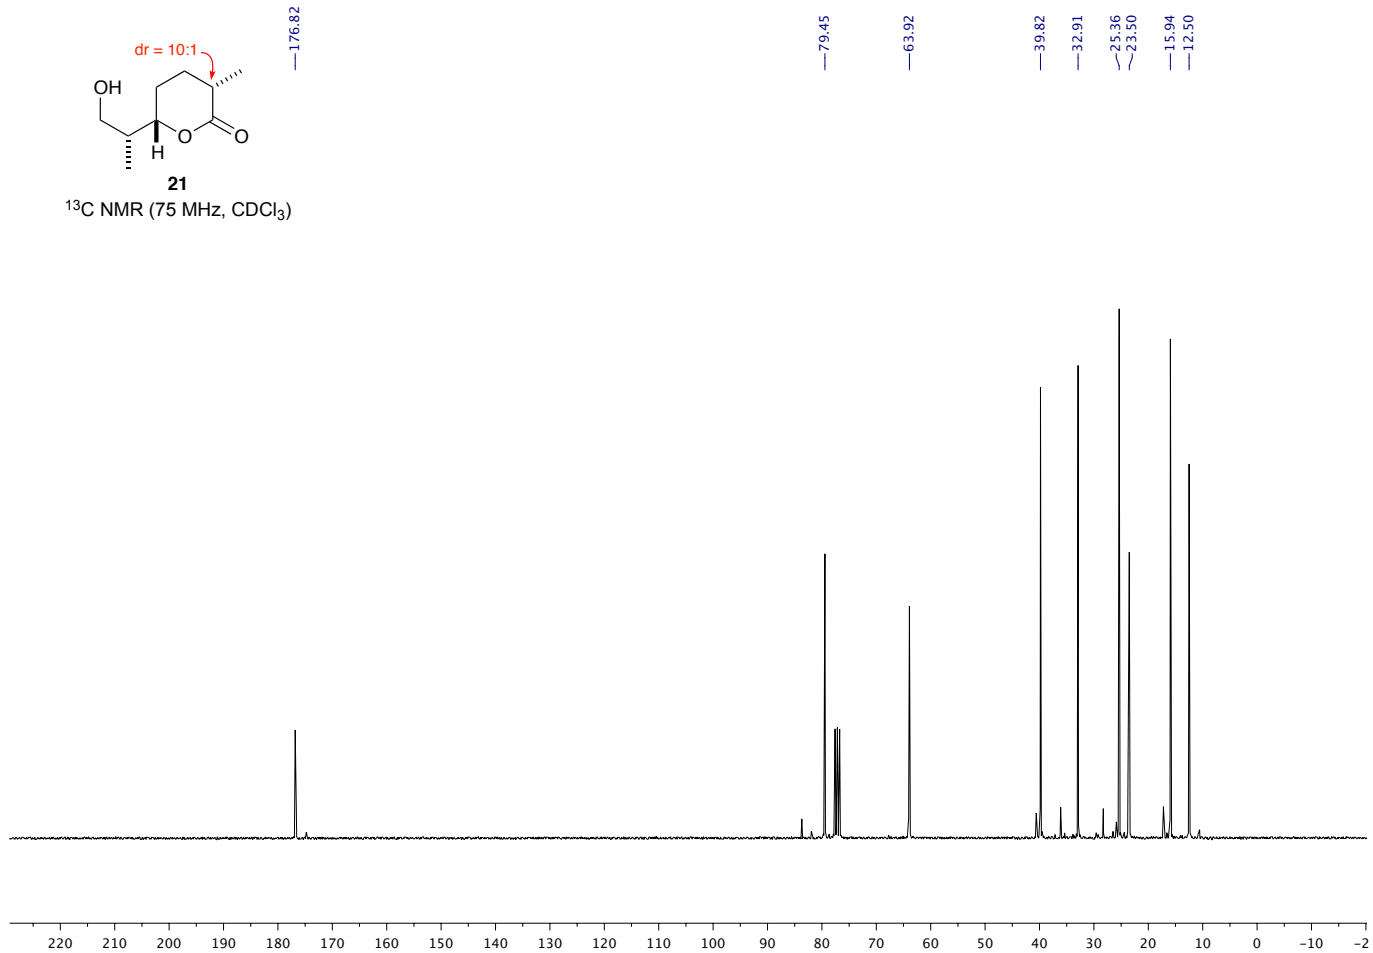

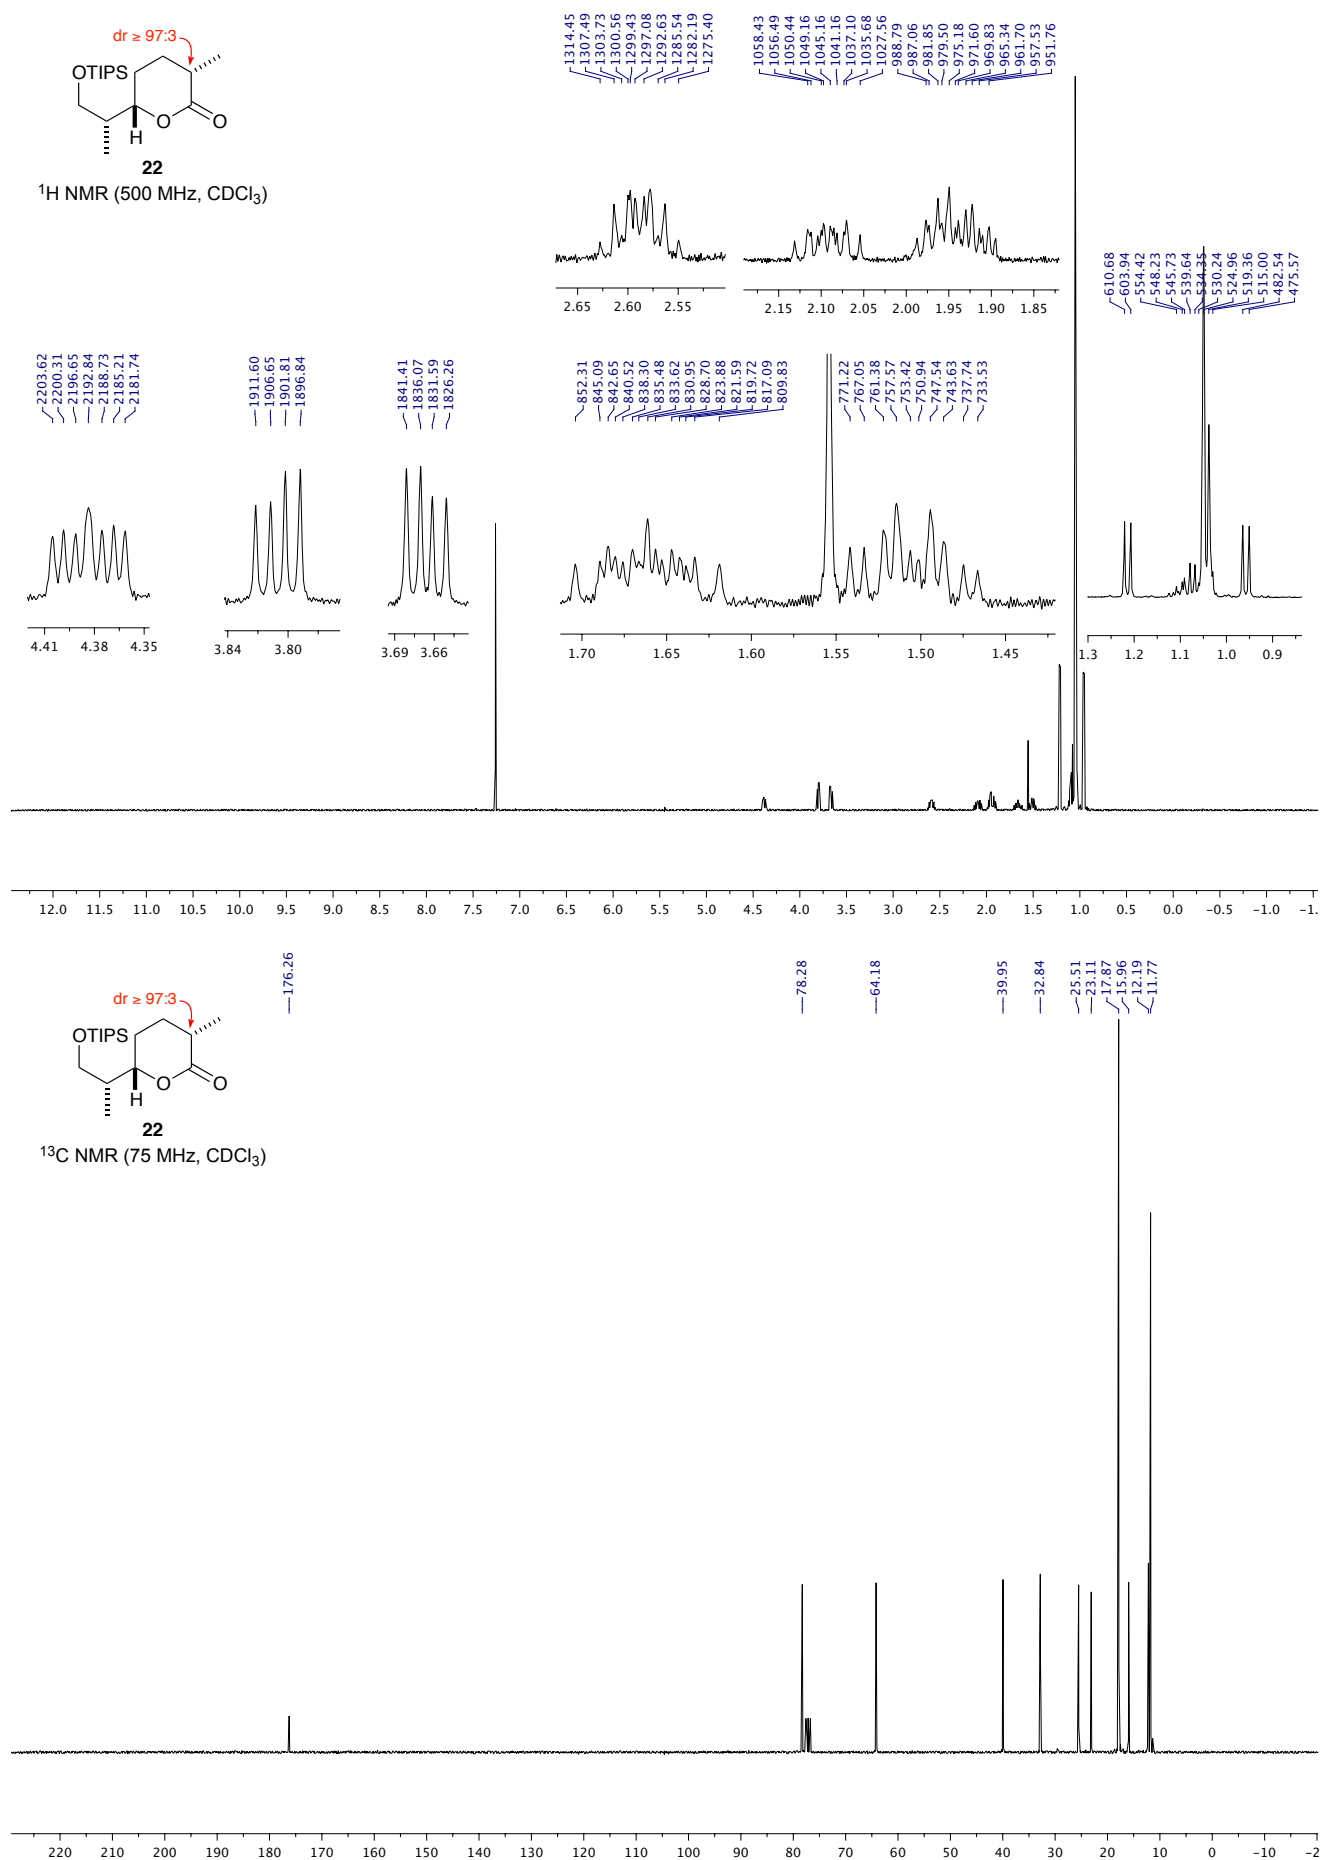

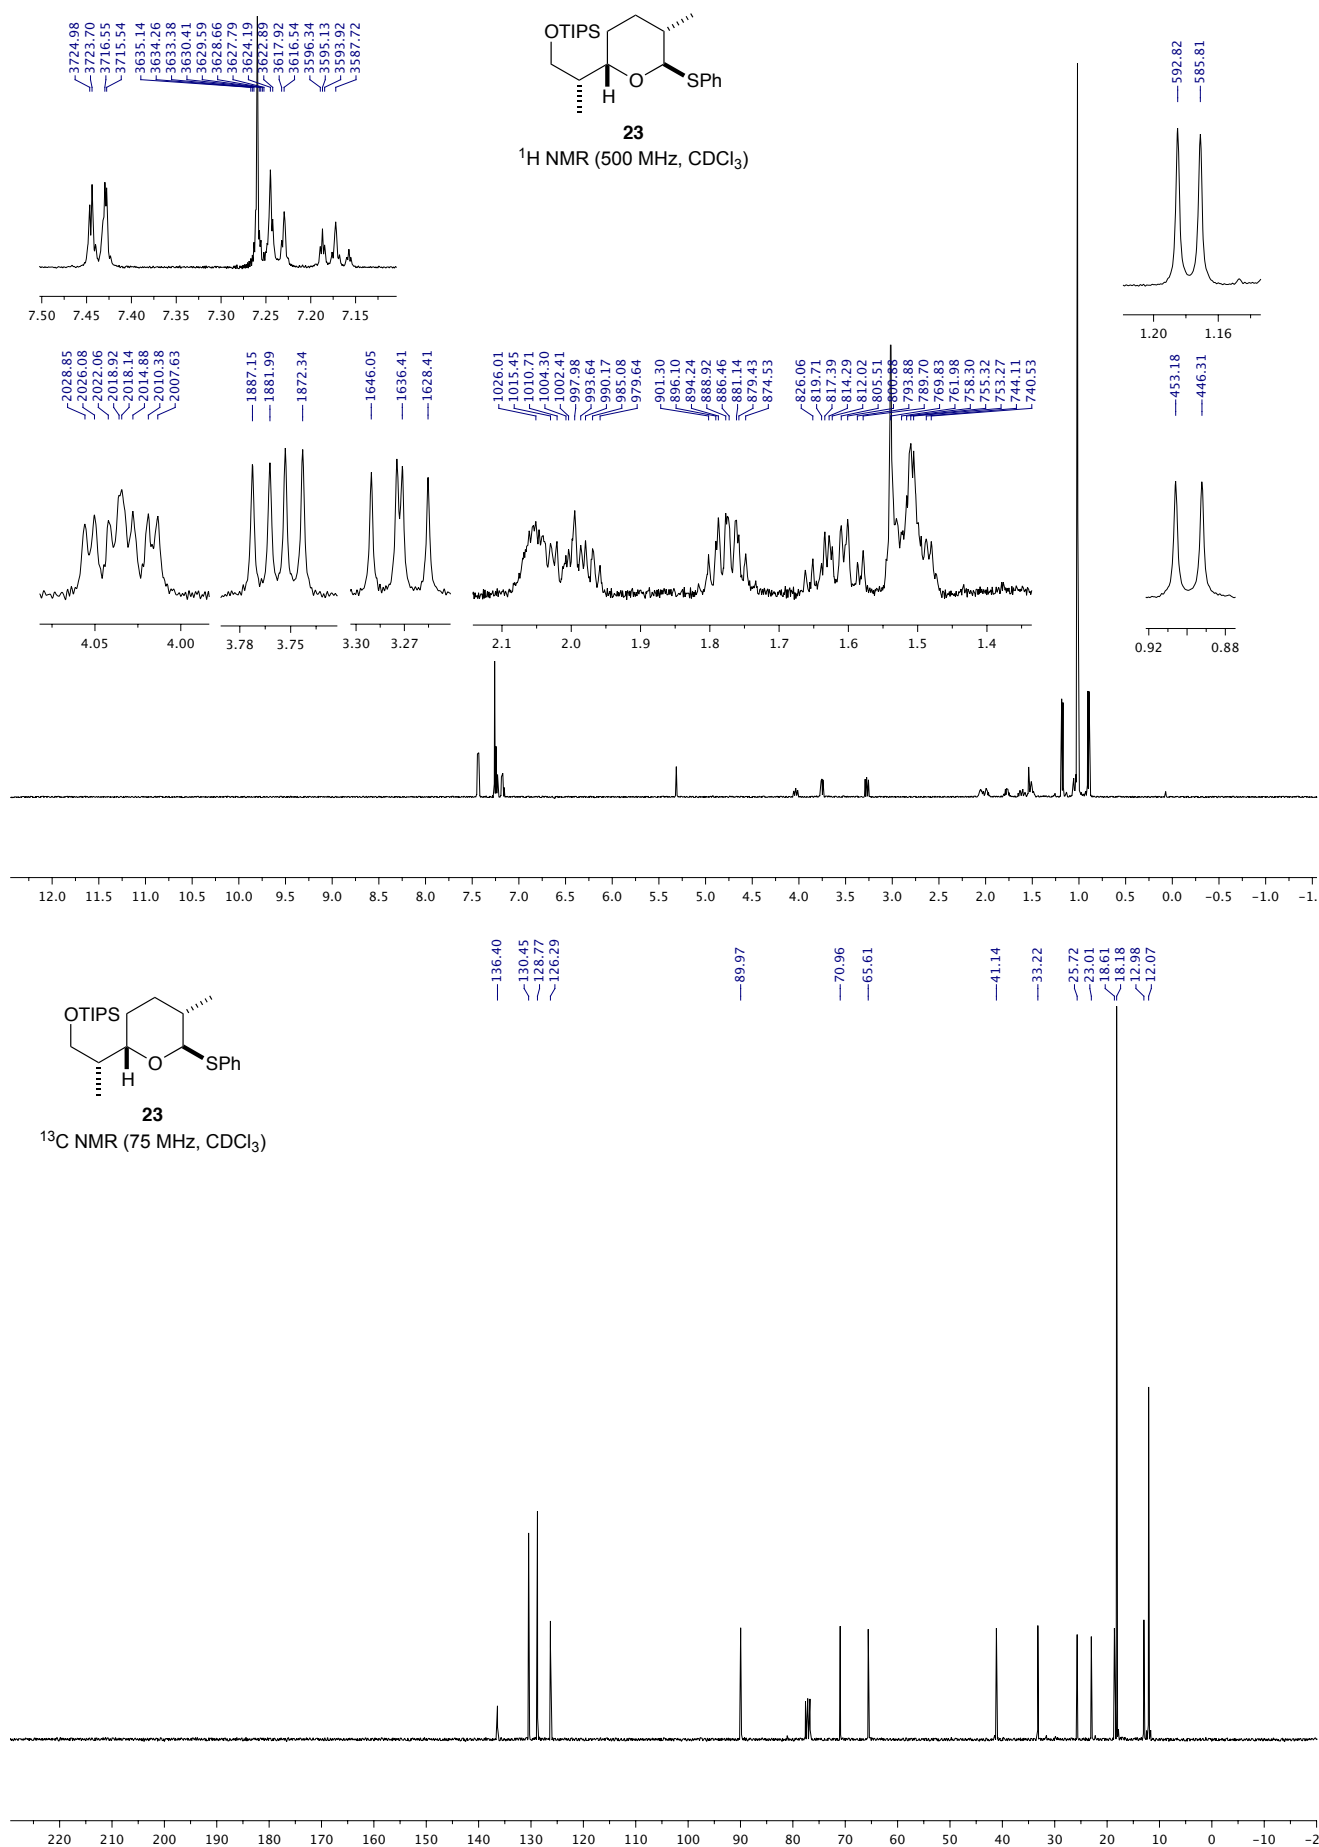

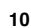<sup>1</sup>H NMR (500 MHz, CDCl<sub>3</sub>)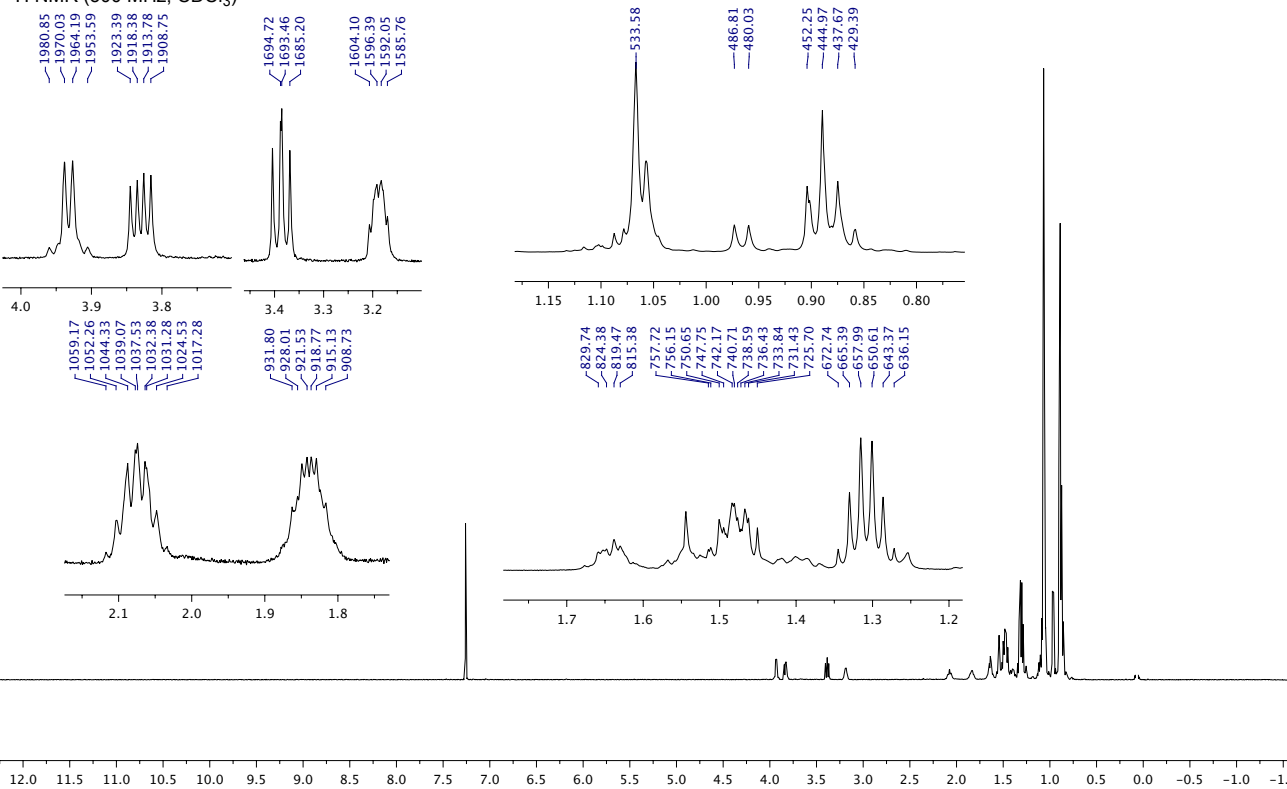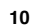 $^{13}\text{C}$  NMR (75 MHz,  $\text{CDCl}_3$ )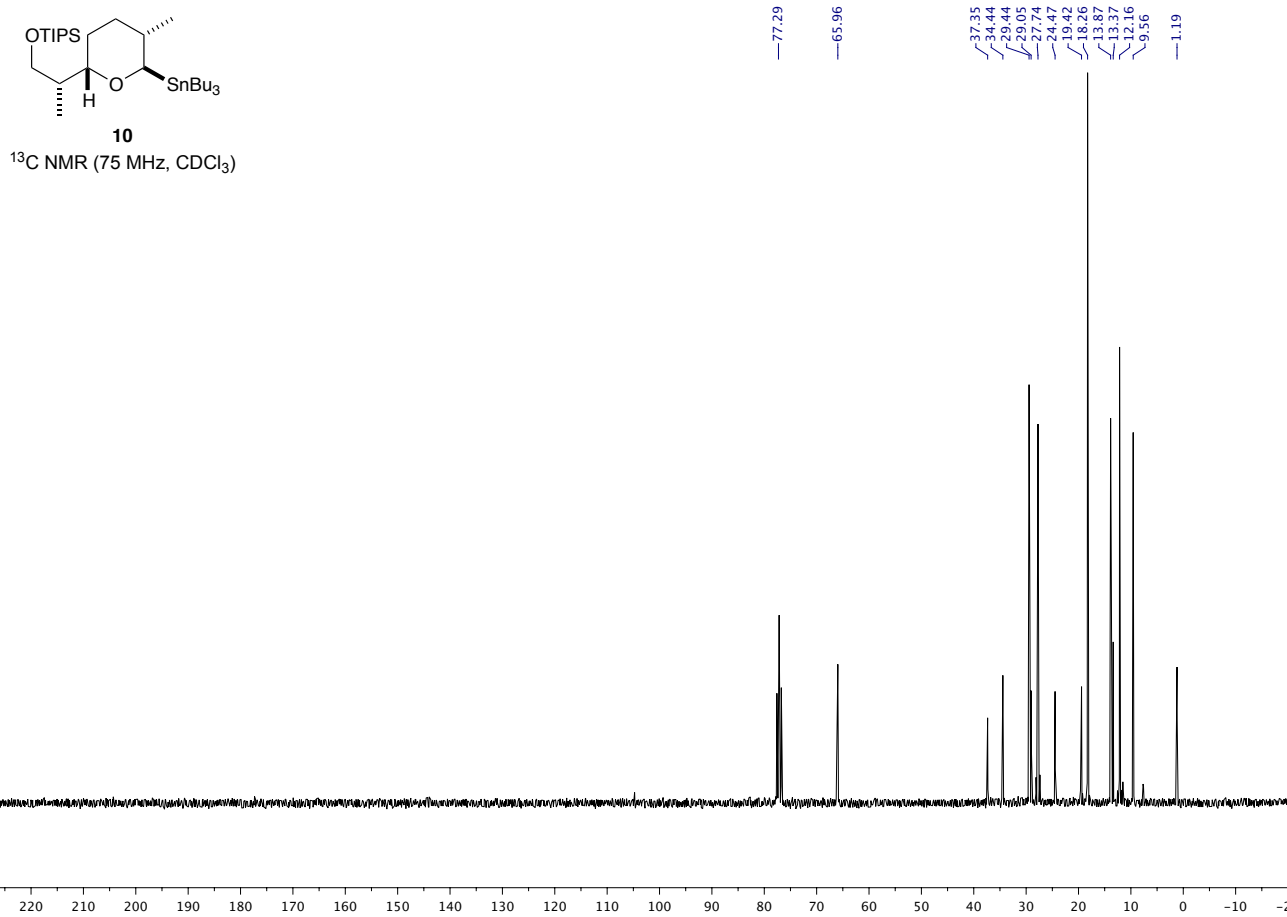

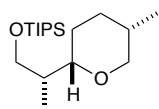

**24**

$^1\text{H}$  NMR (500 MHz,  $\text{CDCl}_3$ )

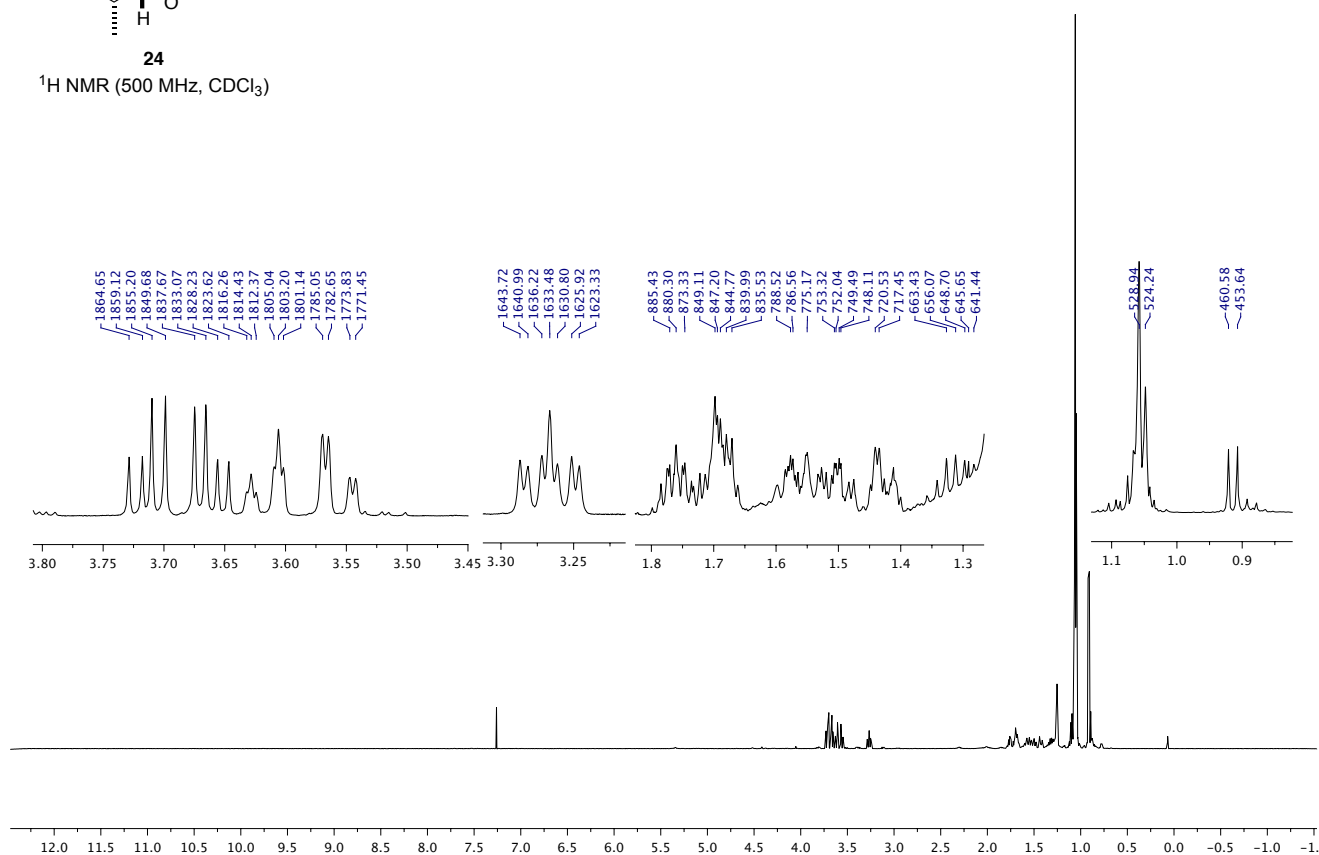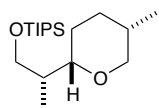

**24**

$^{13}\text{C}$  NMR (75 MHz,  $\text{CDCl}_3$ )

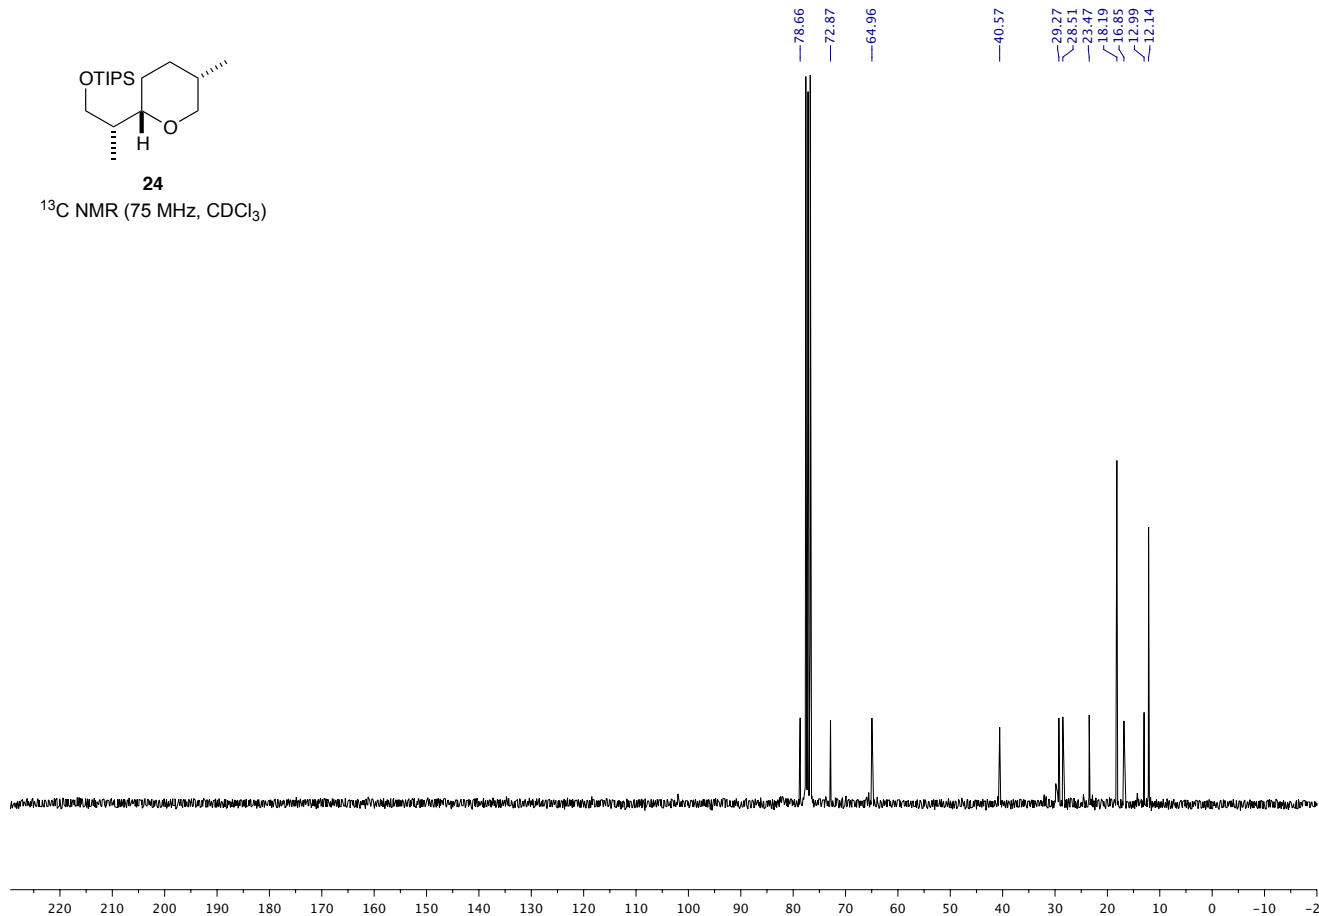

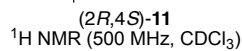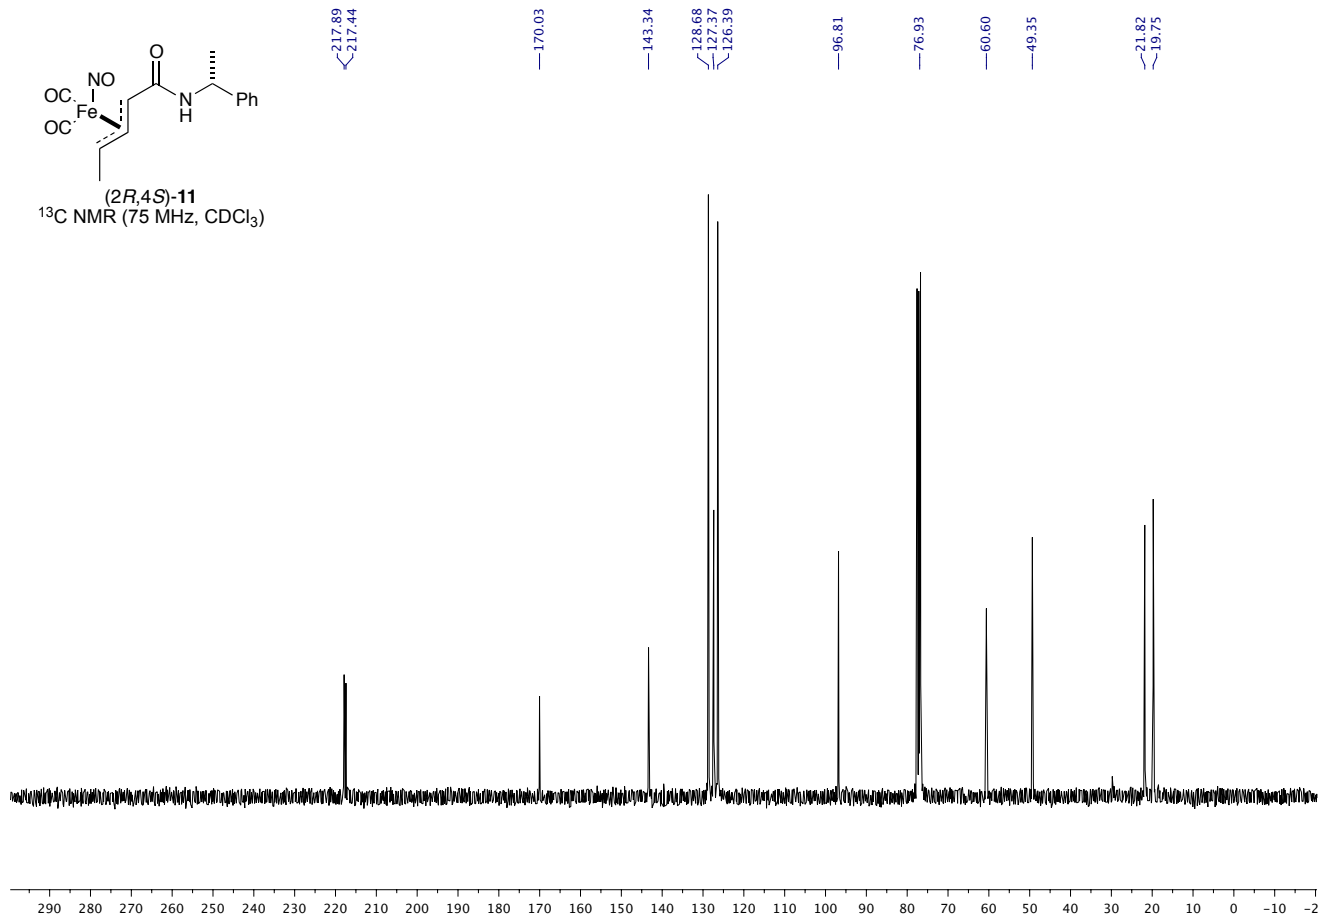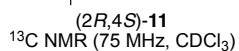

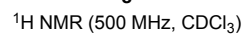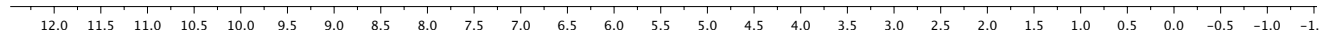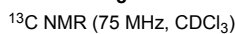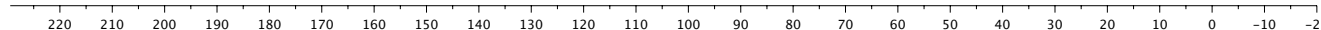

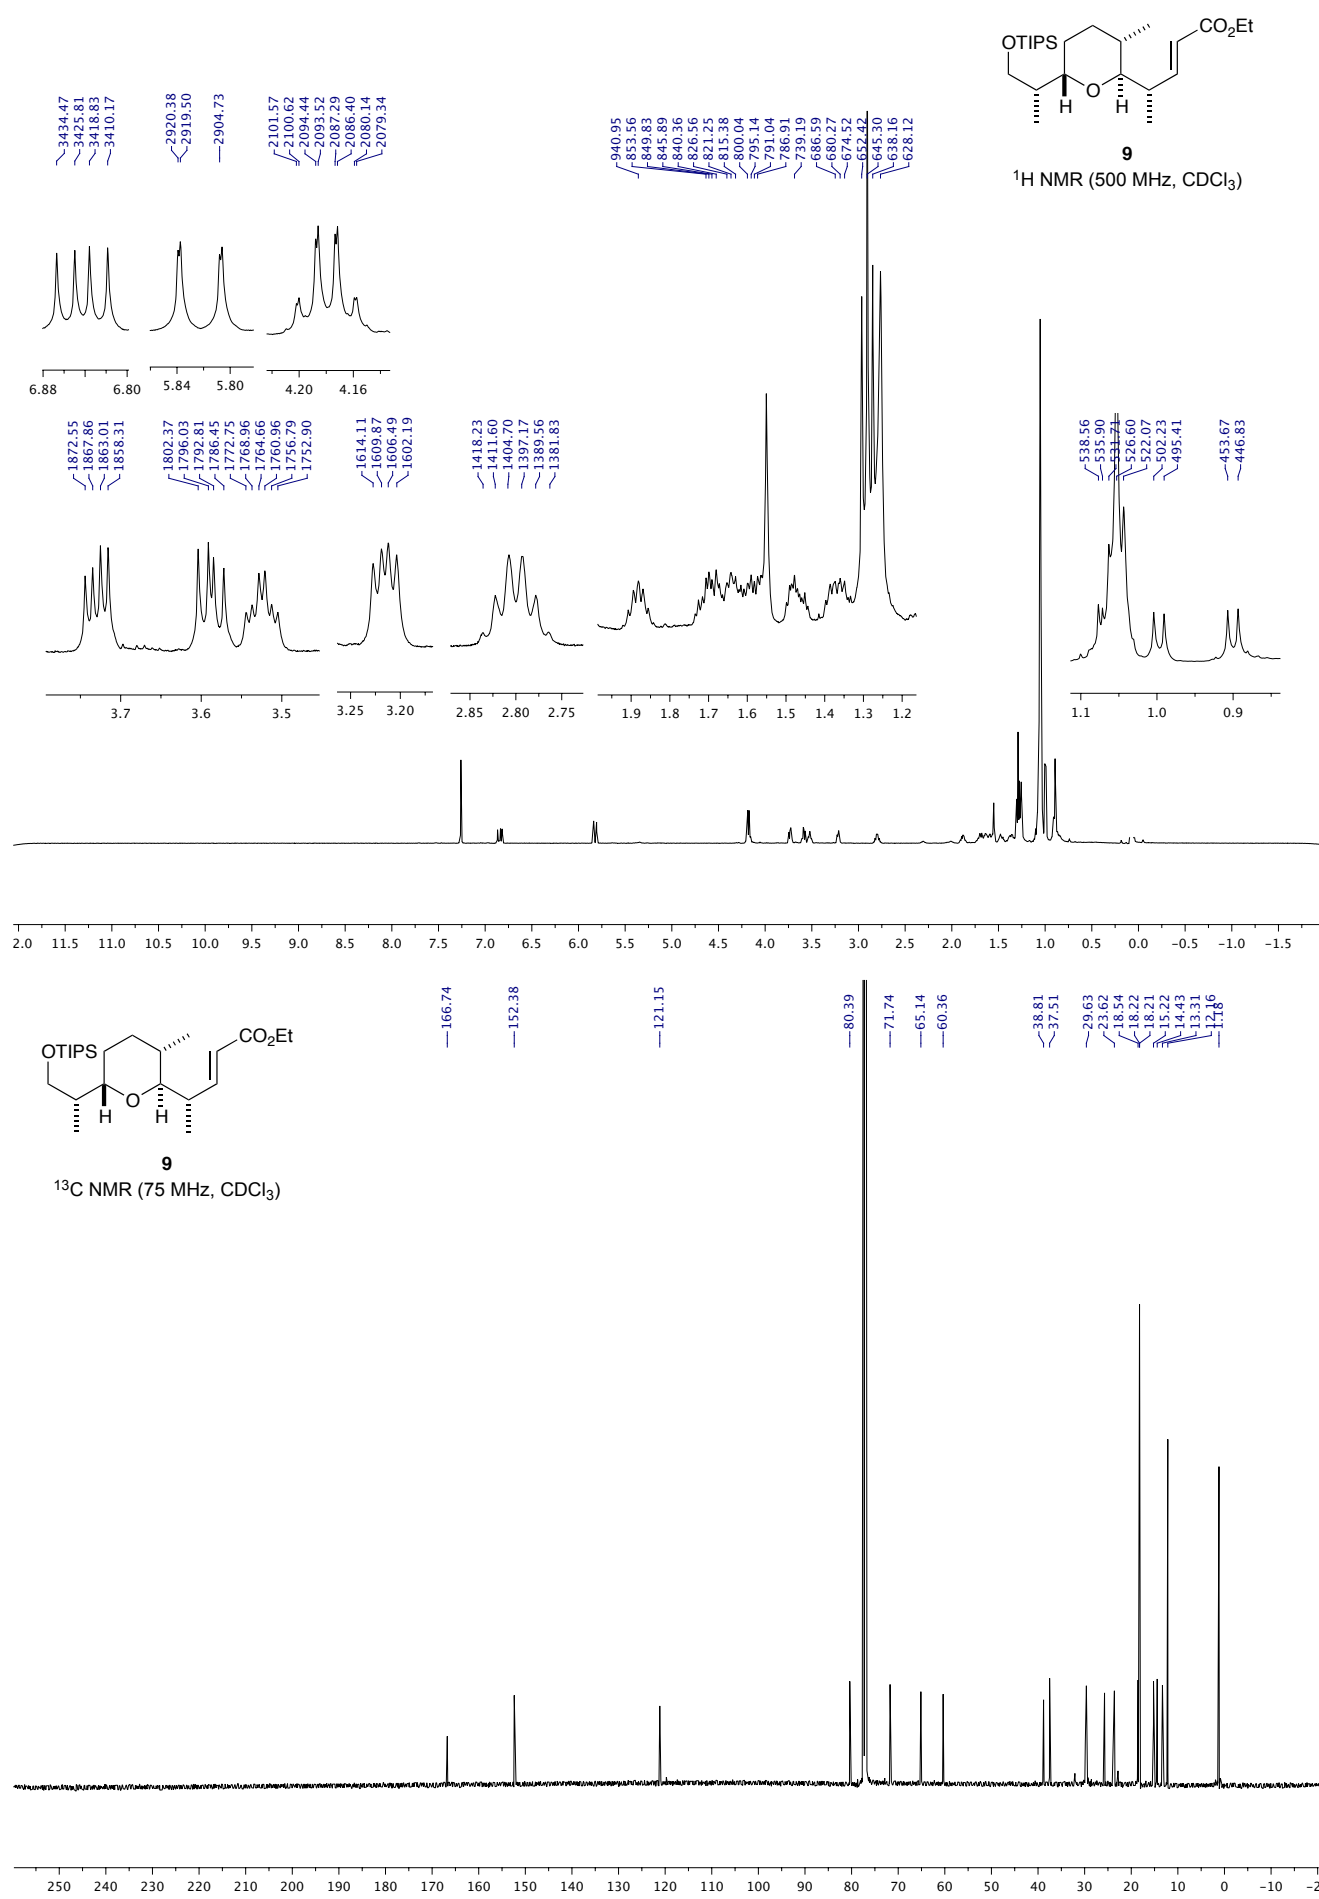



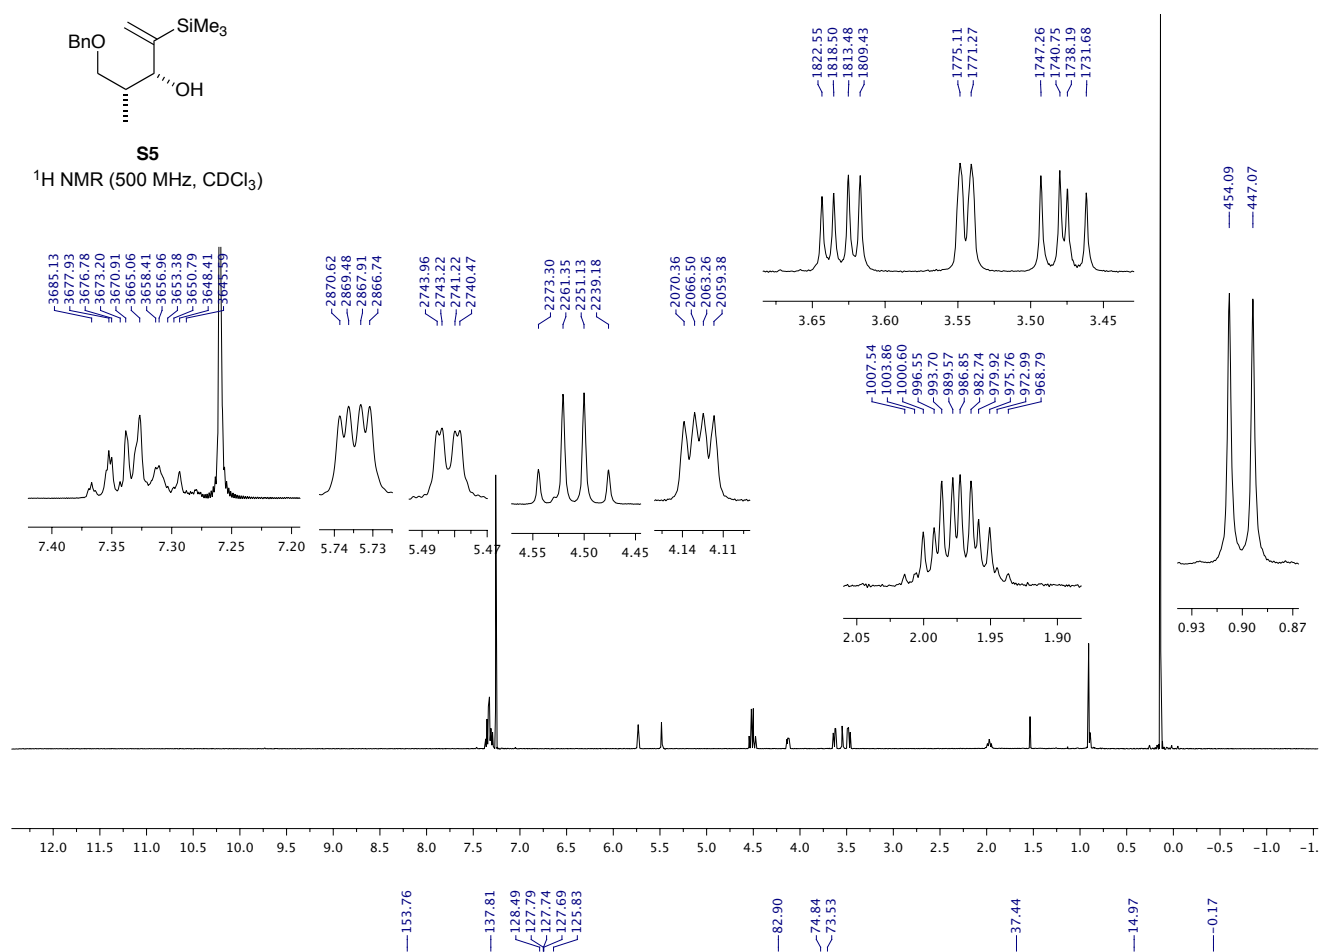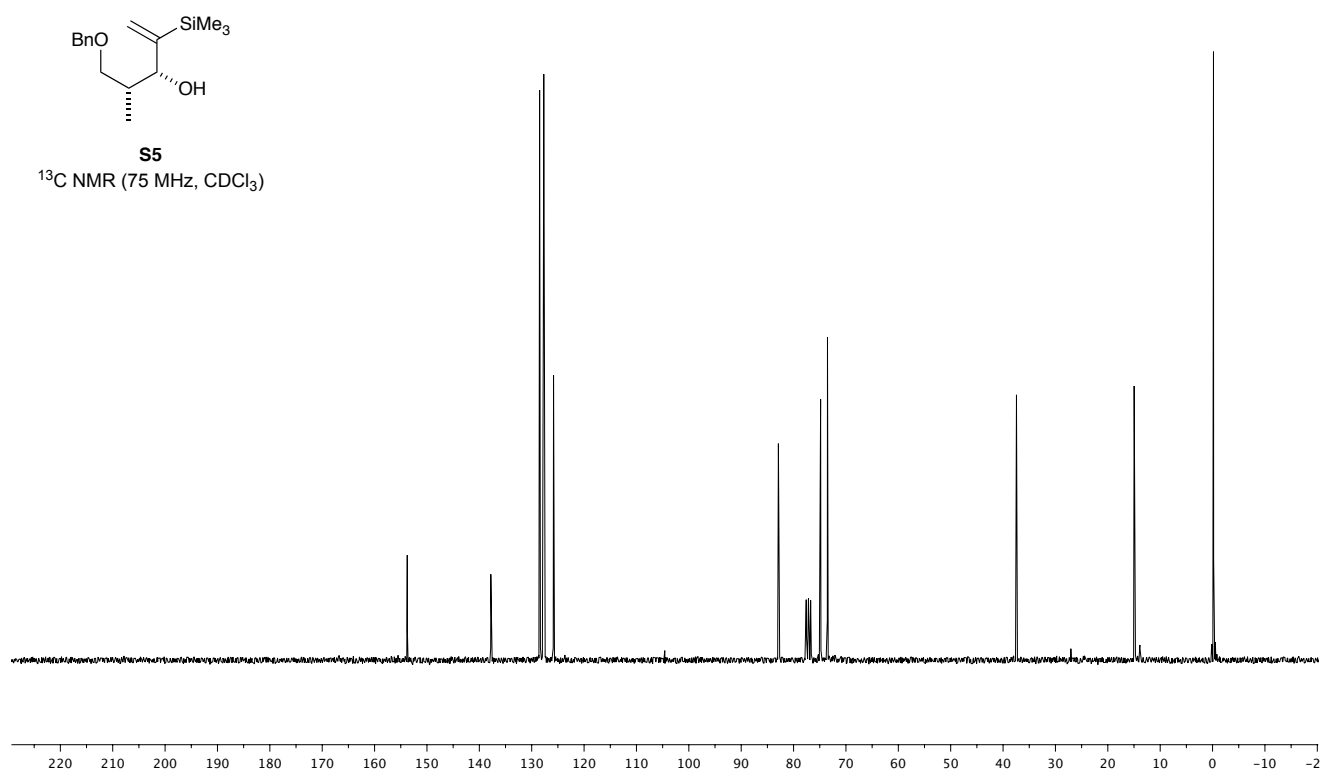

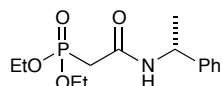

**S6**

<sup>1</sup>H NMR (500 MHz, CDCl<sub>3</sub>)

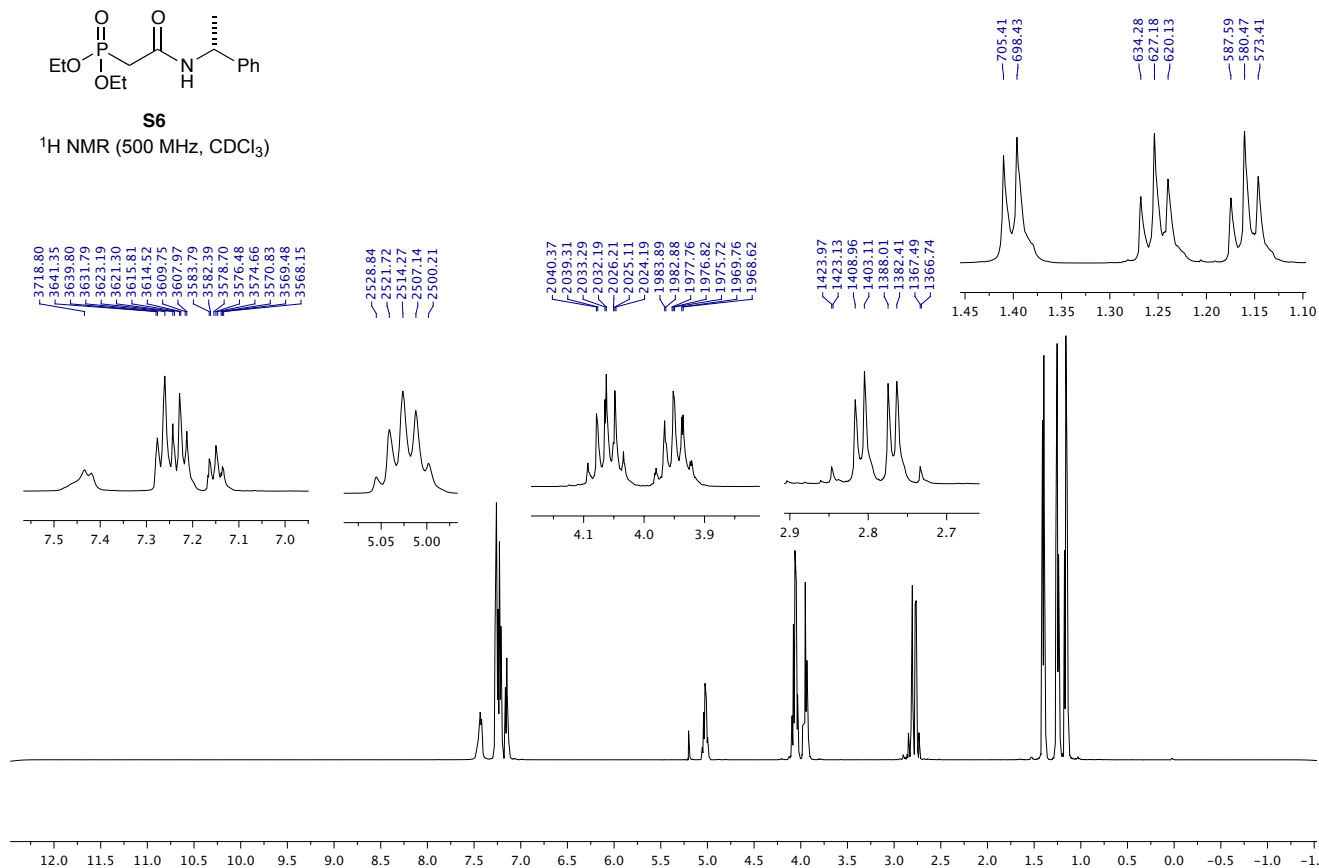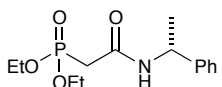

**S6**

<sup>13</sup>C NMR (75 MHz, CDCl<sub>3</sub>)

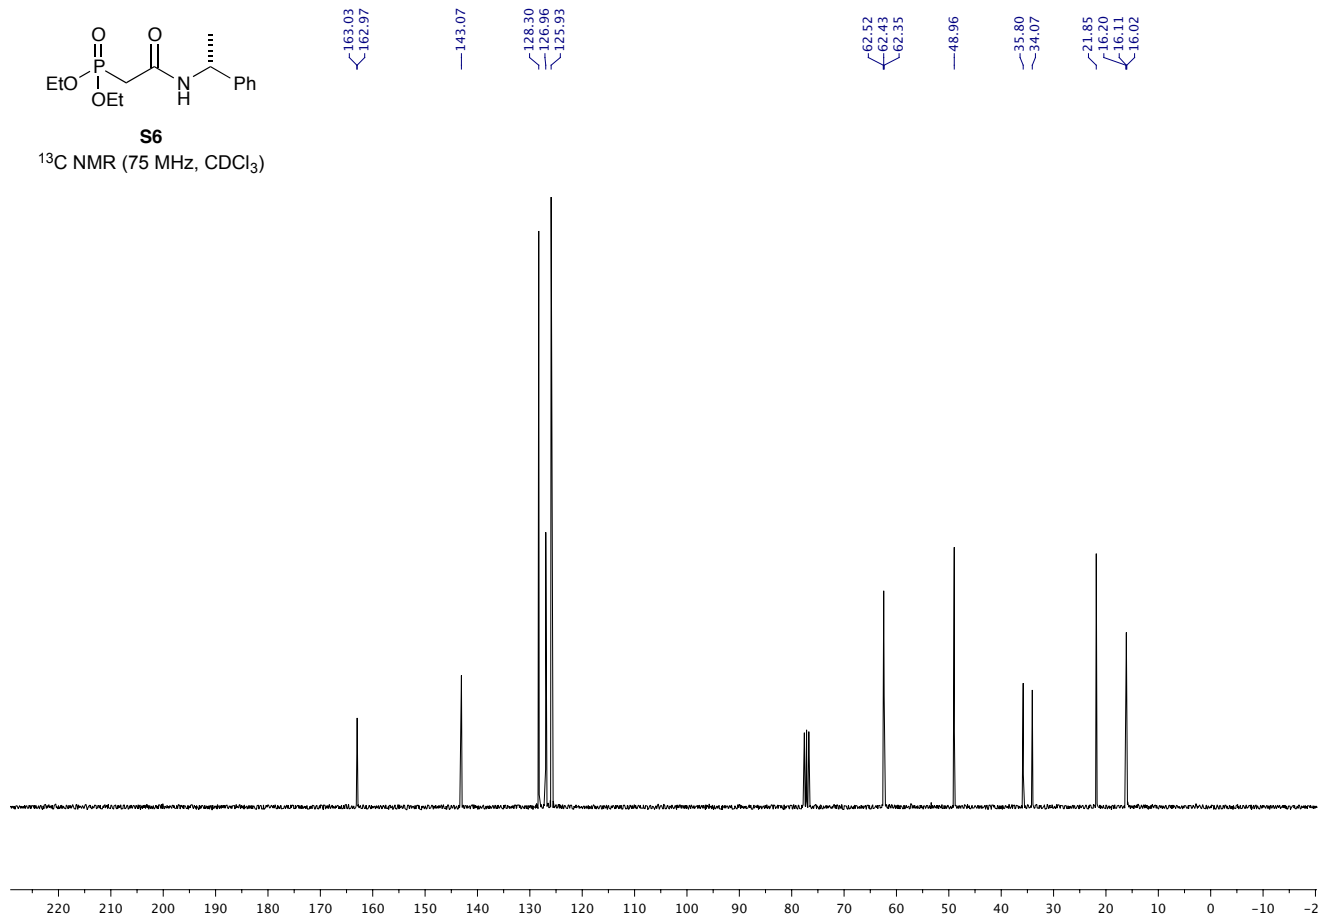

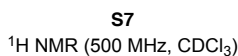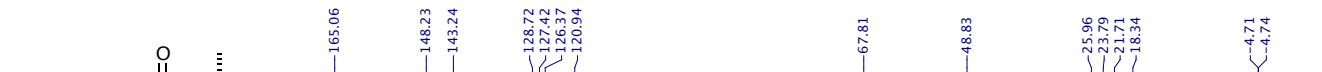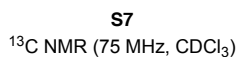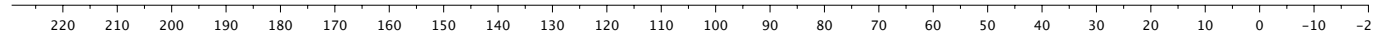

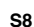<sup>1</sup>H NMR (500 MHz, CDCl<sub>3</sub>)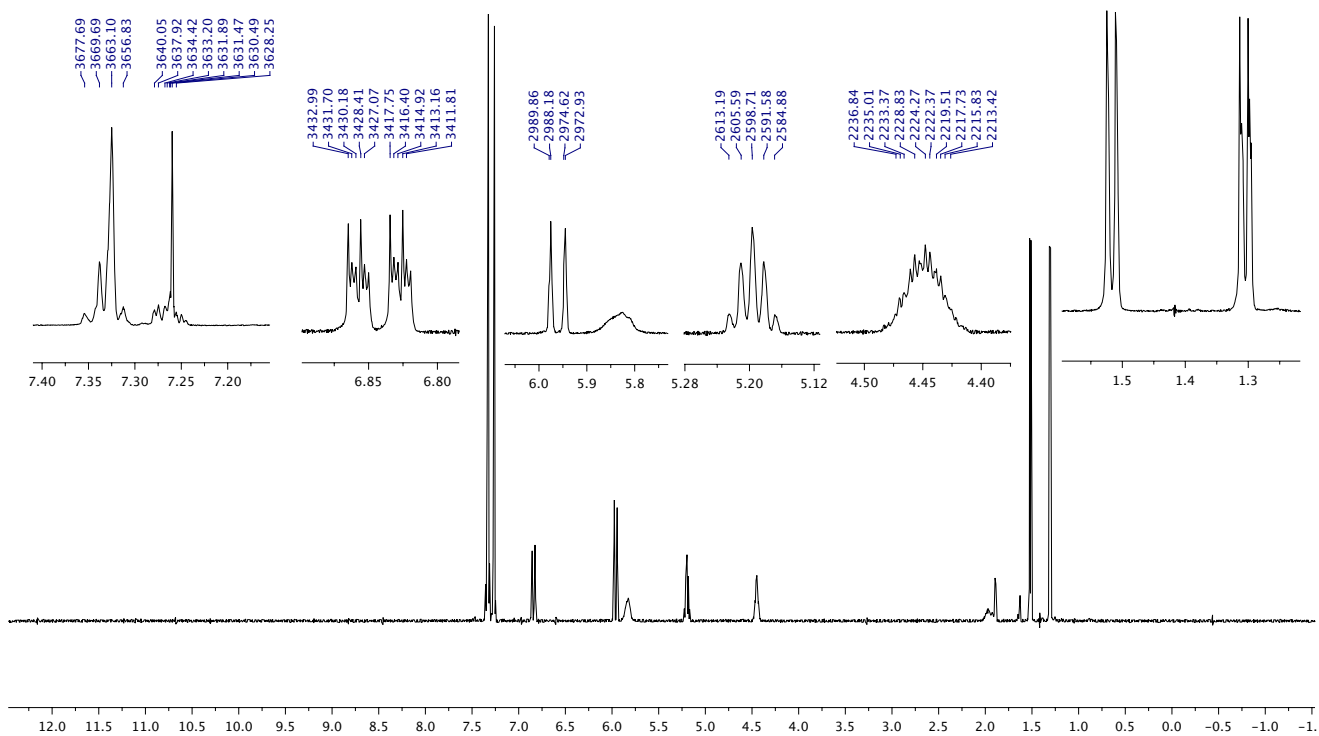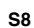 $^{13}\text{C}$  NMR (75 MHz,  $\text{CDCl}_3$ )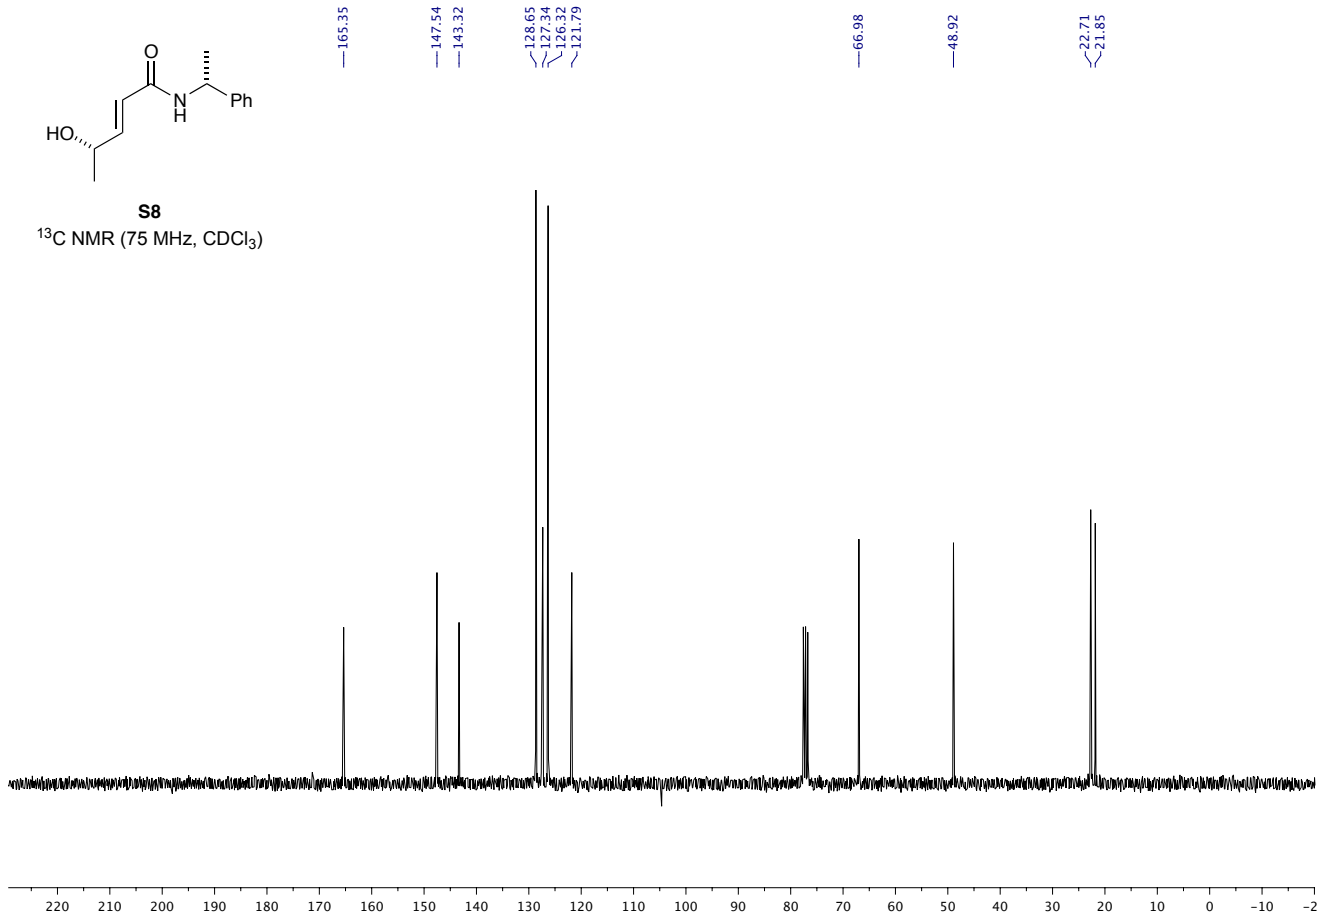

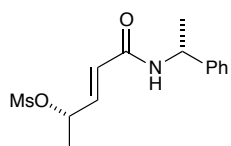

*ent*-1

<sup>1</sup>H NMR (500 MHz, CDCl<sub>3</sub>)

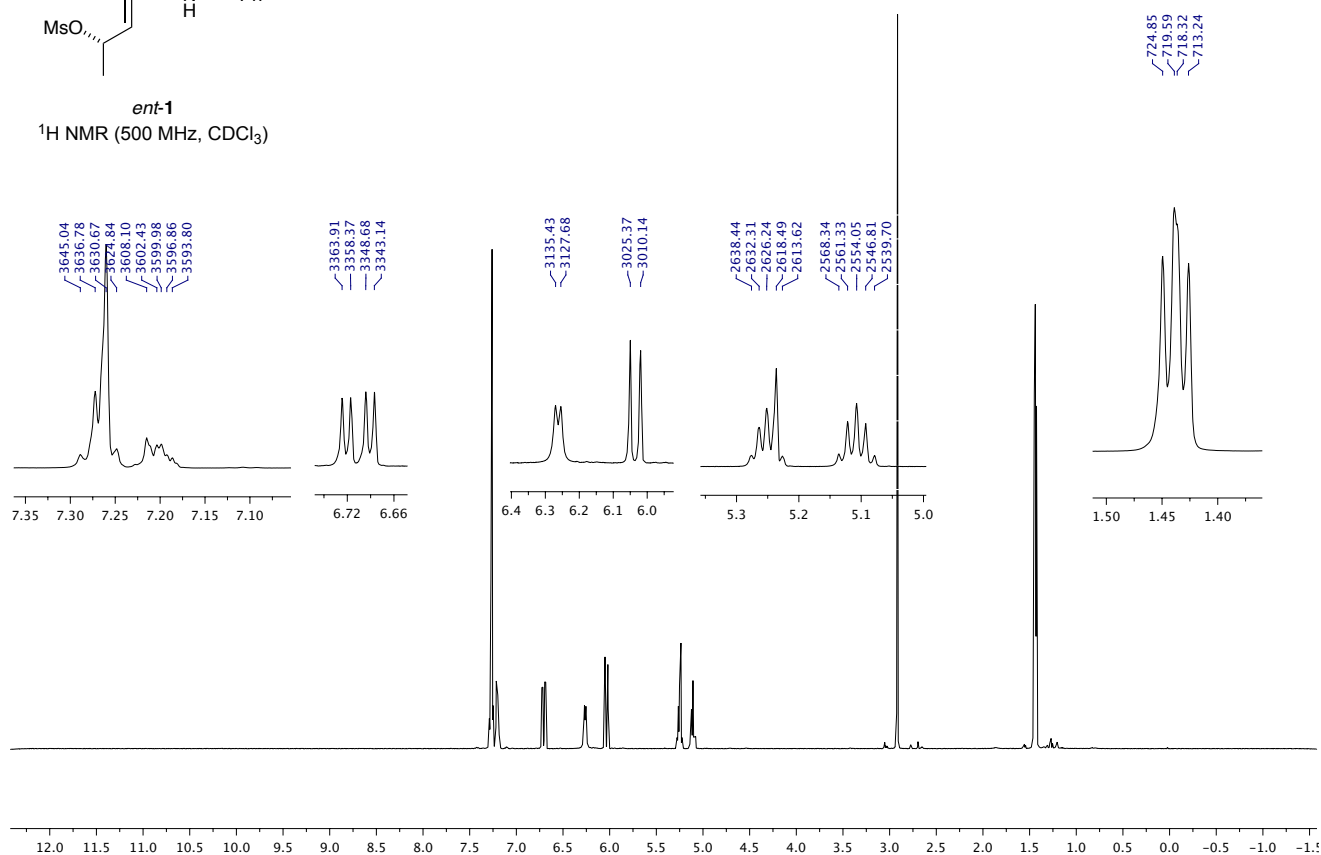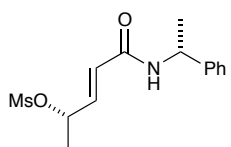

*ent*-1

<sup>13</sup>C NMR (75 MHz, CDCl<sub>3</sub>)

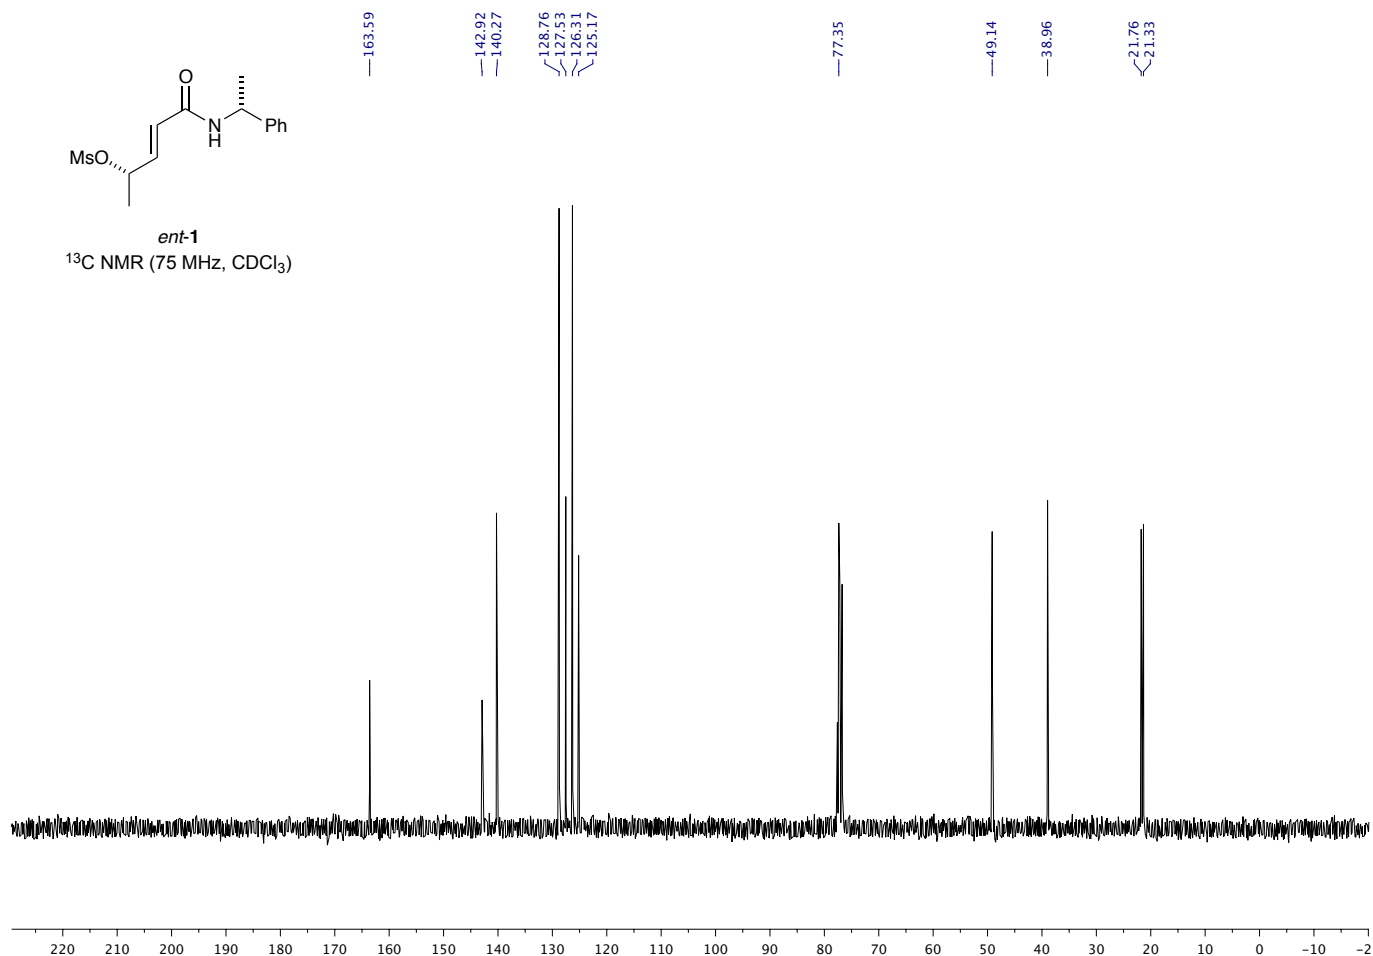

Supplement: c3ob40894a_2.pdf [file c3ob40894a_2.pdf]
